# Supplementary material for: A refined mechanistic model for swelling kinetics of starch granules
Source: Royal Society of Chemistry journal article supplement (doi:10.1039/d4sm00980k), 2025-01-01
Supplement: d4sm00980k1.pdf [file d4sm00980k1.pdf]

Table S1: Data of Figure 1(a).

| b=0.01 |         | b=0.02 |         | b=0.05 |         | b=0.1 |         |
|--------|---------|--------|---------|--------|---------|-------|---------|
| $t^*$  | $R^*$   | $t^*$  | $R^*$   | $t^*$  | $R^*$   | $t^*$ | $R^*$   |
| 0      | 1       | 0      | 1       | 0      | 1       | 0     | 1       |
| 600    | 1.51072 | 400    | 1.51072 | 300    | 1.51072 | 150   | 1.51072 |
| 1200   | 1.51072 | 800    | 1.51072 | 600    | 1.51072 | 300   | 1.51072 |
| 1800   | 1.51072 | 1200   | 1.51072 | 900    | 1.51072 | 450   | 1.51072 |
| 3600   | 1.51072 | 1600   | 1.51072 | 1800   | 1.64788 | 900   | 1.64788 |
| 4200   | 1.51072 | 2000   | 1.51072 | 2100   | 1.74079 | 1050  | 1.74079 |
| 4800   | 1.51072 | 2400   | 1.51072 | 2400   | 1.82004 | 1200  | 1.82004 |
| 5400   | 1.51072 | 2800   | 1.51072 | 2700   | 1.88832 | 1350  | 1.88832 |
| 6000   | 1.51072 | 3200   | 1.51072 | 3000   | 1.94794 | 1500  | 1.94794 |
| 6600   | 1.51072 | 3600   | 1.51889 | 3300   | 2.0007  | 1650  | 2.0007  |
| 7200   | 1.51889 | 4000   | 1.57965 | 3600   | 2.04006 | 1800  | 2.04006 |
| 7800   | 1.5648  | 4400   | 1.63639 | 3900   | 2.04006 | 1950  | 2.04006 |
| 8400   | 1.60856 | 4800   | 1.68873 | 4200   | 2.04006 | 2100  | 2.04006 |
| 9000   | 1.64989 | 5200   | 1.73678 | 4500   | 2.04006 | 2250  | 2.04006 |
| 9600   | 1.68873 | 5600   | 1.7809  | 4800   | 2.04006 | 2400  | 2.04006 |
| 10200  | 1.72515 | 6000   | 1.82151 | 5100   | 2.04006 | 2550  | 2.04006 |
| 10800  | 1.7593  | 6400   | 1.85902 | 5400   | 2.04006 | 2700  | 2.04006 |
| 11400  | 1.79136 | 6800   | 1.8938  | 5700   | 2.04006 | 2850  | 2.04006 |
| 12000  | 1.82151 | 7200   | 1.92618 | 6000   | 2.04006 | 3000  | 2.04006 |
| 12600  | 1.84991 | 8000   | 1.98482 | 6300   | 2.04006 | 3150  | 2.04006 |
| 13200  | 1.87673 | 8400   | 2.01153 | 6600   | 2.04006 | 3300  | 2.04006 |
| 13800  | 1.90211 | 8800   | 2.03673 | 6900   | 2.04006 | 3450  | 2.04006 |
| 14400  | 1.92618 | 9200   | 2.04006 | 7200   | 2.04006 | 3600  | 2.04006 |
| 15000  | 1.94906 | 9600   | 2.04006 | 7500   | 2.04006 | 3750  | 2.04006 |
| 15600  | 1.97085 | 10000  | 2.04006 | 7800   | 2.04006 | 3900  | 2.04006 |
| 16200  | 1.99165 | 11200  | 2.04006 | 8100   | 2.04006 | 4050  | 2.04006 |
| 16800  | 2.01153 | 12400  | 2.04006 | 8400   | 2.04006 | 4200  | 2.04006 |
| 17400  | 2.03056 | 13600  | 2.04006 | 8700   | 2.04006 | 4350  | 2.04006 |
| 18000  | 2.04006 | 14800  | 2.04006 | 9000   | 2.04006 | 4500  | 2.04006 |
| 18600  | 2.04006 | 16000  | 2.04006 | 9300   | 2.04006 | 4650  | 2.04006 |
| 19200  | 2.04006 | 17200  | 2.04006 | 9600   | 2.04006 | 4800  | 2.04006 |
| 19800  | 2.04006 | 18400  | 2.04006 | 9900   | 2.04006 | 4950  | 2.04006 |
| 20000  | 2.04006 | 19600  | 2.04006 | 10000  | 2.04006 | 5000  | 2.04006 |
| □      | □       | 20000  | 2.04006 | □      | □       | □     | □       |

Table S2: Data of Figure 1(b).

| b=0.01 |              |       |              | b=0.05 |              |       |              |
|--------|--------------|-------|--------------|--------|--------------|-------|--------------|
| $t^*$  | $\bar{\phi}$ | $t^*$ | $\bar{\phi}$ | $t^*$  | $\bar{\phi}$ | $t^*$ | $\bar{\phi}$ |
| 0      | 0.586        | 1000  | 0.16996      | 0      | 0.586        | 1000  | 0.16996      |
| 0.25   | 0.3953       | 2000  | 0.16996      | 0.25   | 0.3953       | 2000  | 0.11752      |
| 0.5    | 0.31567      | 3000  | 0.16996      | 0.5    | 0.31567      | 3000  | 0.07951      |
| 0.75   | 0.25894      | 4000  | 0.16996      | 0.75   | 0.25894      | 4000  | 0.06902      |
| 1      | 0.22077      | 5000  | 0.16996      | 1      | 0.22076      | 5000  | 0.06902      |
| 1.25   | 0.19721      | 6000  | 0.16996      | 1.25   | 0.1972       | 6000  | 0.06902      |
| 1.5    | 0.18379      | 7000  | 0.16996      | 1.5    | 0.18378      | 7000  | 0.06902      |
| 1.75   | 0.17668      | 8000  | 0.14867      | 1.75   | 0.17668      | 8000  | 0.06902      |
| 2      | 0.17314      | 9000  | 0.13048      | 2      | 0.17313      | 9000  | 0.06902      |
| 2.25   | 0.17144      | 10000 | 0.11653      | 2.25   | 0.17144      | 10000 | 0.06902      |
| 2.5    | 0.17064      | 11000 | 0.10564      | 2.5    | 0.17064      | 11000 | 0.06902      |
| 2.75   | 0.17027      | 12000 | 0.09696      | 2.75   | 0.17027      | 12000 | 0.06902      |
| 3      | 0.1701       | 13000 | 0.08991      | 3      | 0.1701       | 13000 | 0.06902      |
| 3.25   | 0.17003      | 14000 | 0.08406      | 3.25   | 0.17003      | 14000 | 0.06902      |
| 3.5    | 0.16999      | 15000 | 0.07914      | 3.5    | 0.16999      | 15000 | 0.06902      |
| 3.75   | 0.16997      | 16000 | 0.07494      | 3.75   | 0.16997      | 16000 | 0.06902      |
| 4      | 0.16997      | 17000 | 0.07131      | 4      | 0.16997      | 17000 | 0.06902      |
| 4.25   | 0.16996      | 18000 | 0.06902      | 4.25   | 0.16996      | 18000 | 0.06902      |
| 4.5    | 0.16996      | 19000 | 0.06902      | 4.5    | 0.16996      | 19000 | 0.06902      |
| 4.75   | 0.16996      | 20000 | 0.06902      | 4.75   | 0.16996      | 20000 | 0.06902      |
| 5      | 0.16996      | □     | □            | 5      | 0.16996      | □     | □            |

Table S3: Data of Figure 2(a).

| $T$   | $\phi_{eq}$ | $T$   | $\phi_{eq}$ | $T$   | $\phi_{eq}$ | $T$   | $\phi_{eq}$ |
|-------|-------------|-------|-------------|-------|-------------|-------|-------------|
| 323   | 0.16869     | 333.4 | 0.16869     | 343.8 | 0.12616     | 354.2 | 0.08442     |
| 323.8 | 0.16869     | 334.2 | 0.16869     | 344.6 | 0.12115     | 355   | 0.08254     |
| 324.6 | 0.16869     | 335   | 0.16869     | 345.4 | 0.11656     | 355.8 | 0.08077     |
| 325.4 | 0.16869     | 335.8 | 0.16869     | 346.2 | 0.11237     | 356.6 | 0.0791      |
| 326.2 | 0.16869     | 336.6 | 0.16869     | 347   | 0.10852     | 357.4 | 0.07753     |
| 327   | 0.16869     | 337.4 | 0.16869     | 347.8 | 0.10497     | 358.2 | 0.07603     |
| 327.8 | 0.16869     | 338.2 | 0.16869     | 348.6 | 0.1017      | 359   | 0.07461     |
| 328.6 | 0.16869     | 339   | 0.16869     | 349.4 | 0.09867     | 359.8 | 0.07327     |
| 329.4 | 0.16869     | 339.8 | 0.1598      | 350.2 | 0.09586     | 360.6 | 0.07199     |
| 330.2 | 0.16869     | 340.6 | 0.15172     | 351   | 0.09325     | 361.4 | 0.07077     |
| 331   | 0.16869     | 341.4 | 0.14439     | 351.8 | 0.09082     | 362.2 | 0.06961     |
| 331.8 | 0.16869     | 342.2 | 0.13772     | 352.6 | 0.08855     | 363   | 0.0685      |
| 332.6 | 0.16869     | 343   | 0.13167     | 353.4 | 0.08642     | □     | □           |

Table S4: Data of Figure 2(b).

| $\nu^*$ | $\phi_{eq}(T_0)$ | $\chi_0$ | $\phi_{eq}(T_0)$ | $\nu^*$ | $\phi_{eq}(T_0)$ | $\chi_0$ | $\phi_{eq}(T_0)$ |
|---------|------------------|----------|------------------|---------|------------------|----------|------------------|
| 0.004   | 0.16725          | 0        | 0.05248          | 0.14067 | 0.51453          | 0.27778  | 0.07997          |
| 0.01642 | 0.26916          | 0.02525  | 0.054            | 0.15309 | 0.52647          | 0.30303  | 0.08463          |
| 0.02885 | 0.32235          | 0.05051  | 0.05563          | 0.16552 | 0.53761          | 0.32828  | 0.09004          |
| 0.04127 | 0.36028          | 0.07576  | 0.05741          | 0.17794 | 0.54805          | 0.35354  | 0.09638          |
| 0.0537  | 0.39024          | 0.10101  | 0.05933          | 0.19036 | 0.55788          | 0.37879  | 0.10391          |
| 0.06612 | 0.41518          | 0.12626  | 0.06144          | 0.20279 | 0.56715          | 0.40404  | 0.11298          |
| 0.07855 | 0.43664          | 0.15152  | 0.06375          | 0.21521 | 0.57594          | 0.42929  | 0.12406          |
| 0.09097 | 0.45552          | 0.17677  | 0.06631          | 0.22764 | 0.58429          | 0.45455  | 0.13775          |
| 0.10339 | 0.4724           | 0.20202  | 0.06915          | 0.24006 | 0.59224          | 0.4798   | 0.15479          |
| 0.11582 | 0.48768          | 0.22727  | 0.07232          | 0.25    | 0.59833          | 0.5      | 0.17132          |
| 0.12824 | 0.50165          | 0.25253  | 0.0759           | □       | □                | □        | □                |

Table S5: Data of Figure 3(a).

| modified logistic |         | linear |         | neg-exp |         | step |         |
|-------------------|---------|--------|---------|---------|---------|------|---------|
| $T$               | $\nu^*$ | $T$    | $\nu^*$ | $T$     | $\nu^*$ | $T$  | $\nu^*$ |
| 323               | 0.23    | 323    | 0.23    | 323     | 0.23    | 323  | 0.23    |
| 323.8             | 0.23    | 323.8  | 0.23    | 323.8   | 0.23    | 325  | 0.23    |
| 324.6             | 0.23    | 324.6  | 0.23    | 324.6   | 0.23    | 327  | 0.23    |
| 325.4             | 0.23    | 325.4  | 0.23    | 325.4   | 0.23    | 329  | 0.23    |
| 326.2             | 0.23    | 326.2  | 0.23    | 326.2   | 0.23    | 331  | 0.23    |
| 327               | 0.23    | 327    | 0.23    | 327     | 0.23    | 333  | 0.23    |
| 327.8             | 0.23    | 327.8  | 0.23    | 327.8   | 0.23    | 335  | 0.23    |
| 328.6             | 0.23    | 328.6  | 0.23    | 328.6   | 0.23    | 337  | 0.23    |
| 329.4             | 0.23    | 329.4  | 0.23    | 329.4   | 0.23    | 339  | 0.23    |
| 330.2             | 0.23    | 330.2  | 0.23    | 330.2   | 0.23    | 341  | 0.0041  |
| 331               | 0.23    | 331    | 0.23    | 331     | 0.23    | 343  | 0.0041  |
| 331.8             | 0.23    | 331.8  | 0.23    | 331.8   | 0.23    | 345  | 0.0041  |
| 332.6             | 0.23    | 332.6  | 0.23    | 332.6   | 0.23    | 347  | 0.0041  |
| 333.4             | 0.23    | 333.4  | 0.23    | 333.4   | 0.23    | 349  | 0.0041  |
| 334.2             | 0.23    | 334.2  | 0.23    | 334.2   | 0.23    | 351  | 0.0041  |
| 335               | 0.23    | 335    | 0.23    | 335     | 0.23    | 353  | 0.0041  |
| 335.8             | 0.23    | 335.8  | 0.23    | 335.8   | 0.23    | 355  | 0.0041  |
| 336.6             | 0.23    | 336.6  | 0.23    | 336.6   | 0.23    | 357  | 0.0041  |
| 337.4             | 0.23    | 337.4  | 0.23    | 337.4   | 0.23    | 359  | 0.0041  |
| 338.2             | 0.23    | 338.2  | 0.23    | 338.2   | 0.23    | 361  | 0.0041  |
| 339               | 0.23    | 339    | 0.23    | 339     | 0.23    | 363  | 0.0041  |
| 339.8             | 0.22898 | 339.8  | 0.198   | 339.8   | 0.18532 | □    | □       |
| 340.6             | 0.22611 | 340.6  | 0.166   | 340.6   | 0.13179 |      |         |

|       |         |       |        |       |         |          |         |
|-------|---------|-------|--------|-------|---------|----------|---------|
| 341.4 | 0.21911 | 341.4 | 0.134  | 341.4 | 0.06768 | constant |         |
| 342.2 | 0.20398 | 342.2 | 0.102  | 342.2 | 0.0041  | $T$      | $\nu^*$ |
| 343   | 0.17607 | 343   | 0.07   | 343   | 0.0041  | 323      | 0.0041  |
| 343.8 | 0.13505 | 343.8 | 0.038  | 343.8 | 0.0041  | 363      | 0.0041  |
| 344.6 | 0.08998 | 344.6 | 0.006  | 344.6 | 0.0041  |          |         |
| 345.4 | 0.05331 | 345.4 | 0.0041 | 345.4 | 0.0041  | □        | □       |
| 346.2 | 0.02982 | 346.2 | 0.0041 | 346.2 | 0.0041  | □        | □       |
| 347   | 0.01689 | 347   | 0.0041 | 347   | 0.0041  | □        | □       |
| 347.8 | 0.01032 | 347.8 | 0.0041 | 347.8 | 0.0041  | □        | □       |
| 348.6 | 0.0071  | 348.6 | 0.0041 | 348.6 | 0.0041  | □        | □       |
| 349.4 | 0.00555 | 349.4 | 0.0041 | 349.4 | 0.0041  | □        | □       |
| 350.2 | 0.0048  | 350.2 | 0.0041 | 350.2 | 0.0041  | □        | □       |
| 351   | 0.00444 | 351   | 0.0041 | 351   | 0.0041  | □        | □       |
| 351.8 | 0.00427 | 351.8 | 0.0041 | 351.8 | 0.0041  | □        | □       |
| 352.6 | 0.00418 | 352.6 | 0.0041 | 352.6 | 0.0041  | □        | □       |
| 353.4 | 0.00414 | 353.4 | 0.0041 | 353.4 | 0.0041  | □        | □       |
| 354.2 | 0.00412 | 354.2 | 0.0041 | 354.2 | 0.0041  | □        | □       |
| 355   | 0.00411 | 355   | 0.0041 | 355   | 0.0041  | □        | □       |
| 355.8 | 0.0041  | 355.8 | 0.0041 | 355.8 | 0.0041  | □        | □       |
| 356.6 | 0.0041  | 356.6 | 0.0041 | 356.6 | 0.0041  | □        | □       |
| 357.4 | 0.0041  | 357.4 | 0.0041 | 357.4 | 0.0041  | □        | □       |
| 358.2 | 0.0041  | 358.2 | 0.0041 | 358.2 | 0.0041  | □        | □       |
| 359   | 0.0041  | 359   | 0.0041 | 359   | 0.0041  | □        | □       |
| 359.8 | 0.0041  | 359.8 | 0.0041 | 359.8 | 0.0041  | □        | □       |
| 360.6 | 0.0041  | 360.6 | 0.0041 | 360.6 | 0.0041  | □        | □       |
| 361.4 | 0.0041  | 361.4 | 0.0041 | 361.4 | 0.0041  | □        | □       |
| 362.2 | 0.0041  | 362.2 | 0.0041 | 362.2 | 0.0041  | □        | □       |
| 363   | 0.0041  | 363   | 0.0041 | 363   | 0.0041  | □        | □       |

Table S6: Data of Figure 3(b).

| linear |             | neg-exp |             | modified logistic |             | step  |             | constant |             |
|--------|-------------|---------|-------------|-------------------|-------------|-------|-------------|----------|-------------|
| $T$    | $\phi_{eq}$ | $T$     | $\phi_{eq}$ | $T$               | $\phi_{eq}$ | $T$   | $\phi_{eq}$ | $T$      | $\phi_{eq}$ |
| 323    | 0.58583     | 323     | 0.58583     | 323               | 0.58583     | 323   | 0.58583     | 323      | 0.16869     |
| 323.8  | 0.58583     | 323.8   | 0.58583     | 323.8             | 0.58583     | 323.8 | 0.58583     | 323.8    | 0.16869     |
| 324.6  | 0.58583     | 324.6   | 0.58583     | 324.6             | 0.58583     | 324.6 | 0.58583     | 324.6    | 0.16869     |
| 325.4  | 0.58583     | 325.4   | 0.58583     | 325.4             | 0.58583     | 325.4 | 0.58583     | 325.4    | 0.16869     |
| 326.2  | 0.58583     | 326.2   | 0.58583     | 326.2             | 0.58583     | 326.2 | 0.58583     | 326.2    | 0.16869     |
| 327    | 0.58583     | 327     | 0.58583     | 327               | 0.58583     | 327   | 0.58583     | 327      | 0.16869     |
| 327.8  | 0.58583     | 327.8   | 0.58583     | 327.8             | 0.58583     | 327.8 | 0.58583     | 327.8    | 0.16869     |
| 328.6  | 0.58583     | 328.6   | 0.58583     | 328.6             | 0.58583     | 328.6 | 0.58583     | 328.6    | 0.16869     |
| 329.4  | 0.58583     | 329.4   | 0.58583     | 329.4             | 0.58583     | 329.4 | 0.58583     | 329.4    | 0.16869     |

|       |         |       |         |       |         |       |         |       |         |
|-------|---------|-------|---------|-------|---------|-------|---------|-------|---------|
| 330.2 | 0.58583 | 330.2 | 0.58583 | 330.2 | 0.58583 | 330.2 | 0.58583 | 330.2 | 0.16869 |
| 331   | 0.58583 | 331   | 0.58583 | 331   | 0.58583 | 331   | 0.58583 | 331   | 0.16869 |
| 331.8 | 0.58583 | 331.8 | 0.58583 | 331.8 | 0.58583 | 331.8 | 0.58583 | 331.8 | 0.16869 |
| 332.6 | 0.58583 | 332.6 | 0.58583 | 332.6 | 0.58583 | 332.6 | 0.58583 | 332.6 | 0.16869 |
| 333.4 | 0.58583 | 333.4 | 0.58583 | 333.4 | 0.58583 | 333.4 | 0.58583 | 333.4 | 0.16869 |
| 334.2 | 0.58583 | 334.2 | 0.58583 | 334.2 | 0.58583 | 334.2 | 0.58583 | 334.2 | 0.16869 |
| 335   | 0.58583 | 335   | 0.58583 | 335   | 0.58583 | 335   | 0.58583 | 335   | 0.16869 |
| 335.8 | 0.58583 | 335.8 | 0.58583 | 335.8 | 0.58583 | 335.8 | 0.58583 | 335.8 | 0.16869 |
| 336.6 | 0.58583 | 336.6 | 0.58583 | 336.6 | 0.58583 | 336.6 | 0.58583 | 336.6 | 0.16869 |
| 337.4 | 0.58583 | 337.4 | 0.58583 | 337.4 | 0.58583 | 337.4 | 0.58583 | 337.4 | 0.16869 |
| 338.2 | 0.58583 | 338.2 | 0.58583 | 338.2 | 0.58583 | 338.2 | 0.58583 | 338.2 | 0.16869 |
| 339   | 0.58583 | 339   | 0.58583 | 339   | 0.58583 | 339   | 0.58583 | 339   | 0.16869 |
| 339.8 | 0.55902 | 339.8 | 0.54923 | 339.8 | 0.58078 | 339.8 | 0.1598  | 339.8 | 0.1598  |
| 340.6 | 0.52828 | 340.6 | 0.49497 | 340.6 | 0.57452 | 340.6 | 0.15172 | 340.6 | 0.15172 |
| 341.4 | 0.49224 | 341.4 | 0.39971 | 341.4 | 0.56537 | 341.4 | 0.14439 | 341.4 | 0.14439 |
| 342.2 | 0.44853 | 342.2 | 0.13772 | 342.2 | 0.55001 | 342.2 | 0.13772 | 342.2 | 0.13772 |
| 343   | 0.39254 | 343   | 0.13167 | 343   | 0.52304 | 343   | 0.13167 | 343   | 0.13167 |
| 343.8 | 0.31247 | 343.8 | 0.12616 | 343.8 | 0.47857 | 343.8 | 0.12616 | 343.8 | 0.12616 |
| 344.6 | 0.14405 | 344.6 | 0.12115 | 344.6 | 0.41551 | 344.6 | 0.12115 | 344.6 | 0.12115 |
| 345.4 | 0.11656 | 345.4 | 0.11656 | 345.4 | 0.34154 | 345.4 | 0.11656 | 345.4 | 0.11656 |
| 346.2 | 0.11237 | 346.2 | 0.11237 | 346.2 | 0.26913 | 346.2 | 0.11237 | 346.2 | 0.11237 |
| 347   | 0.10852 | 347   | 0.10852 | 347   | 0.20826 | 347   | 0.10852 | 347   | 0.10852 |
| 347.8 | 0.10497 | 347.8 | 0.10497 | 347.8 | 0.16321 | 347.8 | 0.10497 | 347.8 | 0.10497 |
| 348.6 | 0.1017  | 348.6 | 0.1017  | 348.6 | 0.13328 | 348.6 | 0.1017  | 348.6 | 0.1017  |
| 349.4 | 0.09867 | 349.4 | 0.09867 | 349.4 | 0.11488 | 349.4 | 0.09867 | 349.4 | 0.09867 |
| 350.2 | 0.09586 | 350.2 | 0.09586 | 350.2 | 0.1039  | 350.2 | 0.09586 | 350.2 | 0.09586 |
| 351   | 0.09325 | 351   | 0.09325 | 351   | 0.09717 | 351   | 0.09325 | 351   | 0.09325 |
| 351.8 | 0.09082 | 351.8 | 0.09082 | 351.8 | 0.09271 | 351.8 | 0.09082 | 351.8 | 0.09082 |
| 352.6 | 0.08855 | 352.6 | 0.08855 | 352.6 | 0.08946 | 352.6 | 0.08855 | 352.6 | 0.08855 |
| 353.4 | 0.08642 | 353.4 | 0.08642 | 353.4 | 0.08686 | 353.4 | 0.08642 | 353.4 | 0.08642 |
| 354.2 | 0.08442 | 354.2 | 0.08442 | 354.2 | 0.08463 | 354.2 | 0.08442 | 354.2 | 0.08442 |
| 355   | 0.08254 | 355   | 0.08254 | 355   | 0.08264 | 355   | 0.08254 | 355   | 0.08254 |
| 355.8 | 0.08077 | 355.8 | 0.08077 | 355.8 | 0.08082 | 355.8 | 0.08077 | 355.8 | 0.08077 |
| 356.6 | 0.0791  | 356.6 | 0.0791  | 356.6 | 0.07913 | 356.6 | 0.0791  | 356.6 | 0.0791  |
| 357.4 | 0.07753 | 357.4 | 0.07753 | 357.4 | 0.07754 | 357.4 | 0.07753 | 357.4 | 0.07753 |
| 358.2 | 0.07603 | 358.2 | 0.07603 | 358.2 | 0.07604 | 358.2 | 0.07603 | 358.2 | 0.07603 |
| 359   | 0.07461 | 359   | 0.07461 | 359   | 0.07462 | 359   | 0.07461 | 359   | 0.07461 |
| 359.8 | 0.07327 | 359.8 | 0.07327 | 359.8 | 0.07327 | 359.8 | 0.07327 | 359.8 | 0.07327 |
| 360.6 | 0.07199 | 360.6 | 0.07199 | 360.6 | 0.07199 | 360.6 | 0.07199 | 360.6 | 0.07199 |
| 361.4 | 0.07077 | 361.4 | 0.07077 | 361.4 | 0.07077 | 361.4 | 0.07077 | 361.4 | 0.07077 |
| 362.2 | 0.06961 | 362.2 | 0.06961 | 362.2 | 0.06961 | 362.2 | 0.06961 | 362.2 | 0.06961 |
| 363   | 0.0685  | 363   | 0.0685  | 363   | 0.0685  | 363   | 0.0685  | 363   | 0.0685  |

Table S7: Data of Figure 4(a).

| $\square$ | experimental | step      | linear    | neg-exp   | modified logistic |
|-----------|--------------|-----------|-----------|-----------|-------------------|
| $t^*$     | $R^*$        |           |           |           |                   |
| 0         | 1            | $\square$ | $\square$ | $\square$ | 1                 |
| 152       | 1            | $\square$ | $\square$ | $\square$ | 1.00791           |
| 312       | 1            | $\square$ | $\square$ | $\square$ | 1.00791           |
| 320       | 1            | $\square$ | 1         | $\square$ | 1.00791           |
| 472       | 1            | 1.0044    | 0.99736   | 0.9973    | 1.009             |
| 632       | 1.01         | 1.0044    | 0.99736   | 0.9973    | 1.05004           |
| 640       | 1.01         | 1.0044    | 0.99736   | 0.9973    | 1.05561           |
| 792       | 1.3          | 1.0044    | 1.00614   | 0.9973    | 1.33732           |
| 952       | 2.05         | 2.27384   | 2.45233   | 2.38009   | 2.00489           |
| 960       | 2.09         | 2.29678   | 2.46935   | 2.39929   | 2.04403           |
| 1112      | 2.68         | 2.60727   | 2.71301   | 2.66957   | 2.69988           |
| 1272      | 3            | 2.80116   | 2.87573   | 2.84615   | 3.01495           |
| 1280      | 3.01         | 2.80889   | 2.88234   | 2.85328   | 3.02317           |
| 1432      | 3.13         | 2.93214   | 2.98849   | 2.96733   | 3.12188           |
| 1592      | 3.18         | 3.0262    | 3.06986   | 3.05452   | 3.17115           |
| 1600      | 3.18         | 3.03018   | 3.07329   | 3.0582    | 3.17293           |
| 1752      | 3.2          | 3.09524   | 3.12895   | 3.11797   | 3.19877           |
| 1912      | 3.21         | 3.14559   | 3.17076   | 3.16327   | 3.21              |
| 1920      | 3.21         | 3.1477    | 3.17246   | 3.16512   | 3.21              |
| 2072      | 3.21         | 3.18096   | 3.19824   | 3.19367   | 3.21              |
| 2232      | 3.21         | 3.20354   | 3.21      | 3.21      | 3.21              |
| 2240      | 3.21         | 3.20435   | 3.21      | 3.21      | 3.21              |
| 2392      | 3.21         | 3.21      | 3.21      | 3.21      | 3.21              |
| 2552      | 3.21         | 3.21      | 3.21      | 3.21      | 3.21              |
| 2560      | 3.21         | 3.21      | 3.21      | 3.21      | 3.21              |
| 2712      | 3.21         | 3.21      | 3.21      | 3.21      | 3.21              |
| 2800      | 3.21         | 3.21      | 3.21      | 3.21      | 3.21              |

Table S8: Data of Figure 4(b).

| $t^*$ | experimental | step      | linear    | neg-exp   | modified logistic |
|-------|--------------|-----------|-----------|-----------|-------------------|
| 0     | 1            | $\square$ | $\square$ | $\square$ | 1                 |
| 152   | 1            | $\square$ | 1.00024   | 0.99776   | 1.00222           |
| 312   | 1            | $\square$ | 1.00024   | 0.99776   | 1.00222           |
| 320   | 1            | $\square$ | 1.00024   | 0.99776   | 1.00222           |
| 472   | 1            | 0.99809   | 1.00024   | 0.99776   | 1.00336           |
| 632   | 1.01         | 0.99809   | 1.0321    | 1.01799   | 1.03243           |
| 640   | 1.02         | 0.99809   | 1.03607   | 1.0212    | 1.03543           |
| 792   | 1.17         | 0.99809   | 1.1553    | 1.13075   | 1.16798           |
| 952   | 1.41         | 1.47334   | 1.53909   | 1.5166    | 1.41742           |
| 960   | 1.42         | 1.47678   | 1.54157   | 1.51955   | 1.42831           |
| 1112  | 1.57         | 1.53298   | 1.58344   | 1.5687    | 1.56676           |
| 1272  | 1.64         | 1.57769   | 1.61813   | 1.60849   | 1.62542           |
| 1280  | 1.64         | 1.57962   | 1.61964   | 1.61021   | 1.62733           |
| 1432  | 1.67         | 1.61186   | 1.64489   | 1.63872   | 1.65499           |
| 1592  | 1.68         | 1.63813   | 1.66496   | 1.66122   | 1.67341           |
| 1600  | 1.68         | 1.63927   | 1.66581   | 1.66216   | 1.67414           |
| 1752  | 1.69         | 1.65815   | 1.67922   | 1.67718   | 1.68506           |
| 1912  | 1.69         | 1.67297   | 1.68822   | 1.68737   | 1.69              |
| 1920  | 1.69         | 1.67359   | 1.68854   | 1.68774   | 1.69              |
| 2072  | 1.69         | 1.68329   | 1.69      | 1.69      | 1.69              |
| 2232  | 1.69         | 1.68955   | 1.69      | 1.69      | 1.69              |
| 2240  | 1.69         | 1.68976   | 1.69      | 1.69      | 1.69              |
| 2392  | 1.69         | 1.69      | 1.69      | 1.69      | 1.69              |
| 2552  | 1.69         | 1.69      | 1.69      | 1.69      | 1.69              |
| 2560  | 1.69         | 1.69      | 1.69      | 1.69      | 1.69              |
| 2712  | 1.69         | 1.69      | 1.69      | 1.69      | 1.69              |
| 2800  | 1.69         | 1.69      | 1.69      | 1.69      | 1.69              |

Table S9: Data of Figure 4(c-d).

| Fig4(c) |         |         |         |                   | Fig4(d)  |          |          |                   |
|---------|---------|---------|---------|-------------------|----------|----------|----------|-------------------|
| $t^*$   | step    | linear  | neg-exp | modified logistic | step     | linear   | neg-exp  | modified logistic |
| 0       | □       | □       | □       | 0                 | □        | □        | □        | 0                 |
| 24      | □       | □       | □       | 0.00791           | □        | □        | □        | 0.00222           |
| 48      | □       | □       | □       | 0.00791           | □        | □        | □        | 0.00222           |
| 72      | □       | □       | □       | 0.00791           | □        | □        | □        | 0.00222           |
| 96      | □       | □       | □       | 0.00791           | □        | 0        | □        | 0.00222           |
| 120     | □       | □       | □       | 0.00791           | □        | 2.41E-04 | 0.00224  | 0.00222           |
| 144     | □       | □       | □       | 0.00791           | □        | 2.41E-04 | 0.00224  | 0.00222           |
| 168     | □       | □       | □       | 0.00791           | □        | 2.41E-04 | 0.00224  | 0.00222           |
| 192     | □       | □       | □       | 0.00791           | □        | 2.41E-04 | 0.00224  | 0.00222           |
| 216     | □       | □       | □       | 0.00791           | □        | 2.41E-04 | 0.00224  | 0.00222           |
| 240     | □       | □       | □       | 0.00791           | □        | 2.41E-04 | 0.00224  | 0.00222           |
| 264     | □       | □       | □       | 0.00791           | □        | 2.41E-04 | 0.00224  | 0.00222           |
| 288     | □       | □       | □       | 0.00791           | □        | 2.41E-04 | 0.00224  | 0.00222           |
| 312     | □       | □       | □       | 0.00791           | □        | 2.41E-04 | 0.00224  | 0.00222           |
| 336     | □       | 0.00264 | □       | 0.00791           | □        | 2.41E-04 | 0.00224  | 0.00222           |
| 360     | □       | 0.00264 | 0.0027  | 0.00791           | □        | 2.41E-04 | 0.00224  | 0.00222           |
| 384     | □       | 0.00264 | 0.0027  | 0.00791           | 1.15E-08 | 2.41E-04 | 0.00224  | 0.00222           |
| 408     | □       | 0.00264 | 0.0027  | 0.00791           | 0.00191  | 2.41E-04 | 0.00224  | 0.00222           |
| 432     | □       | 0.00264 | 0.0027  | 0.00791           | 0.00191  | 2.40E-04 | 0.00224  | 0.00222           |
| 456     | 0.00438 | 0.00264 | 0.0027  | 0.00791           | 0.00192  | 2.34E-04 | 0.00224  | 0.00221           |
| 480     | 0.0044  | 0.00264 | 0.0027  | 0.00982           | 0.00195  | 2.05E-04 | 0.00227  | 0.00418           |
| 504     | 0.00439 | 0.00265 | 0.00271 | 0.01247           | 0.00205  | 9.95E-05 | 0.00238  | 0.00675           |
| 528     | 0.00433 | 0.00271 | 0.00277 | 0.0156            | 0.00237  | 2.18E-04 | 0.0027   | 0.0094            |
| 552     | 0.00411 | 0.00293 | 0.003   | 0.01947           | 0.00318  | 0.00102  | 0.0035   | 0.01205           |
| 576     | 0.00339 | 0.00365 | 0.00371 | 0.02437           | 0.00495  | 0.00449  | 0.00435  | 0.01448           |
| 600     | 0.00146 | 0.00558 | 0.00564 | 0.03049           | 0.00835  | 0.01098  | 7.43E-05 | 0.01638           |
| 624     | 0.00296 | 0.01    | 0.01007 | 0.03774           | 0.01422  | 0.01594  | 0.00261  | 0.01739           |
| 648     | 0.0118  | 0.01887 | 0.01894 | 0.04563           | 0.02342  | 0.01868  | 0.00303  | 0.0172            |
| 672     | 0.0277  | 0.03473 | 0.03479 | 0.05321           | 0.03669  | 0.01868  | 7.04E-04 | 0.01572           |
| 696     | 0.0533  | 0.06034 | 0.06041 | 0.05911           | 0.05454  | 0.01572  | 0.00452  | 0.01308           |
| 720     | 0.0913  | 0.09829 | 0.09836 | 0.06176           | 0.07711  | 0.01007  | 0.01226  | 0.00969           |
| 744     | 0.143   | 0.15047 | 0.15054 | 0.05981           | 0.10416  | 0.00251  | 0.02155  | 0.0061            |
| 768     | 0.211   | 0.21773 | 0.2178  | 0.05257           | 0.13515  | 0.00556  | 0.03062  | 0.00291           |
| 792     | 0.293   | 0.29096 | 0.2998  | 0.04022           | 0.16927  | 0.01206  | 0.0366   | 6.27E-04          |
| 816     | 0.388   | 0.36285 | 0.39286 | 0.0239            | 0.20559  | 0.01389  | 0.0346   | 4.30E-04          |
| 840     | 0.494   | 0.43621 | 0.47664 | 0.00548           | 0.24313  | 0.00611  | 0.0145   | 1.83E-04          |
| 864     | 0.609   | 0.49787 | 0.55263 | 0.01281           | 0.15253  | 0.02077  | 0.05383  | 0.00119           |
| 888     | 0.728   | 0.50025 | 0.58015 | 0.02873           | 0.12737  | 0.09172  | 0.17508  | 0.0033            |



|      |        |         |         |          |         |          |         |          |
|------|--------|---------|---------|----------|---------|----------|---------|----------|
| 912  | 0.289  | 0.50385 | 0.41875 | 0.04043  | 0.10281 | 0.17374  | 0.14872 | 0.00565  |
| 936  | 0.251  | 0.44264 | 0.36569 | 0.04665  | 0.07941 | 0.14714  | 0.12367 | 0.00773  |
| 960  | 0.206  | 0.37838 | 0.30832 | 0.04694  | 0.05757 | 0.12237  | 0.10035 | 0.0091   |
| 984  | 0.157  | 0.314   | 0.24982 | 0.04168  | 0.03758 | 0.09965  | 0.07898 | 0.00953  |
| 1008 | 0.108  | 0.25169 | 0.19257 | 0.03197  | 0.01957 | 0.07911  | 0.05972 | 0.00894  |
| 1032 | 0.0602 | 0.19298 | 0.13826 | 0.01947  | 0.0036  | 0.0608   | 0.0426  | 0.00741  |
| 1056 | 0.0155 | 0.13888 | 0.08802 | 0.00601  | 0.01035 | 0.04466  | 0.02758 | 0.00513  |
| 1080 | 0.0252 | 0.08996 | 0.04252 | 0.00666  | 0.02236 | 0.03062  | 0.01458 | 0.00234  |
| 1104 | 0.0615 | 0.04649 | 0.0021  | 0.0172   | 0.03253 | 0.01854  | 0.00348 | 7.20E-04 |
| 1128 | 0.0931 | 0.00846 | 0.03318 | 0.0248   | 0.04101 | 0.00827  | 0.00587 | 0.00383  |
| 1152 | 0.12   | 0.0243  | 0.06346 | 0.02923  | 0.04795 | 3.48E-04 | 0.01362 | 0.00683  |
| 1176 | 0.143  | 0.05208 | 0.08898 | 0.03069  | 0.05349 | 0.00748  | 0.01993 | 0.00958  |
| 1200 | 0.161  | 0.07523 | 0.11007 | 0.02969  | 0.05778 | 0.01328  | 0.02496 | 0.01199  |
| 1224 | 0.176  | 0.09418 | 0.12713 | 0.02684  | 0.06099 | 0.0179   | 0.02887 | 0.01403  |
| 1248 | 0.187  | 0.10933 | 0.14053 | 0.02279  | 0.06323 | 0.0215   | 0.03178 | 0.01566  |
| 1272 | 0.196  | 0.12111 | 0.15069 | 0.0181   | 0.06464 | 0.0242   | 0.03383 | 0.0169   |
| 1296 | 0.201  | 0.12992 | 0.15799 | 0.01322  | 0.06533 | 0.02612  | 0.03515 | 0.01776  |
| 1320 | 0.204  | 0.13613 | 0.16279 | 0.00849  | 0.0654  | 0.02738  | 0.03584 | 0.01826  |
| 1344 | 0.205  | 0.14009 | 0.16543 | 0.00415  | 0.06496 | 0.02807  | 0.03599 | 0.01845  |
| 1368 | 0.205  | 0.14211 | 0.16623 | 3.45E-04 | 0.06408 | 0.02829  | 0.03569 | 0.01835  |
| 1392 | 0.203  | 0.1425  | 0.16545 | 0.00285  | 0.06283 | 0.0281   | 0.03502 | 0.018    |
| 1416 | 0.199  | 0.1415  | 0.16335 | 0.00542  | 0.06128 | 0.02759  | 0.03405 | 0.01745  |
| 1440 | 0.195  | 0.13934 | 0.16016 | 0.00736  | 0.05949 | 0.0268   | 0.03282 | 0.01672  |
| 1464 | 0.19   | 0.13622 | 0.15605 | 0.00872  | 0.05751 | 0.02579  | 0.0314  | 0.01584  |
| 1488 | 0.184  | 0.13231 | 0.15122 | 0.00955  | 0.05537 | 0.0246   | 0.02982 | 0.01486  |
| 1512 | 0.177  | 0.12778 | 0.1458  | 0.00989  | 0.05312 | 0.02328  | 0.02813 | 0.01378  |
| 1536 | 0.17   | 0.12275 | 0.13992 | 0.00983  | 0.05078 | 0.02186  | 0.02636 | 0.01265  |
| 1560 | 0.163  | 0.11734 | 0.13371 | 0.00941  | 0.04839 | 0.02037  | 0.02454 | 0.01147  |
| 1584 | 0.156  | 0.11165 | 0.12725 | 0.00871  | 0.04596 | 0.01884  | 0.02268 | 0.01027  |
| 1608 | 0.148  | 0.10577 | 0.12062 | 0.00777  | 0.04352 | 0.01728  | 0.02082 | 0.00907  |
| 1632 | 0.141  | 0.09976 | 0.1139  | 0.00666  | 0.04108 | 0.01571  | 0.01897 | 0.00787  |
| 1656 | 0.133  | 0.09369 | 0.10715 | 0.00541  | 0.03866 | 0.01415  | 0.01715 | 0.0067   |
| 1680 | 0.126  | 0.08761 | 0.10042 | 0.00408  | 0.03627 | 0.01262  | 0.01536 | 0.00556  |
| 1704 | 0.118  | 0.08157 | 0.09375 | 0.0027   | 0.03392 | 0.01113  | 0.01362 | 0.00447  |
| 1728 | 0.111  | 0.07561 | 0.08717 | 0.00131  | 0.03161 | 0.00968  | 0.01194 | 0.00343  |
| 1752 | 0.103  | 0.06975 | 0.08073 | 6.55E-05 | 0.02936 | 0.00829  | 0.01033 | 0.00245  |
| 1776 | 0.0964 | 0.06403 | 0.07444 | 0.00139  | 0.02717 | 0.00696  | 0.00879 | 0.00153  |
| 1800 | 0.0895 | 0.05847 | 0.06833 | 0.00265  | 0.02505 | 0.0057   | 0.00734 | 6.84E-04 |
| 1824 | 0.0828 | 0.05308 | 0.0624  | 0.00382  | 0.023   | 0.00451  | 0.00596 | 8.66E-05 |
| 1848 | 0.0764 | 0.04789 | 0.05669 | 0.00488  | 0.02102 | 0.00341  | 0.00468 | 7.77E-04 |
| 1872 | 0.0701 | 0.04289 | 0.05119 | 0.00537  | 0.01911 | 0.00238  | 0.00348 | 0.00118  |
| 1896 | 0.0641 | 0.03811 | 0.04593 | 0.00462  | 0.01728 | 0.00144  | 0.00238 | 0.00102  |
| 1920 | 0.0583 | 0.03356 | 0.04089 | 0.00398  | 0.01554 | 5.86E-04 | 0.00138 | 8.78E-04 |

|      |          |          |          |          |          |          |          |          |
|------|----------|----------|----------|----------|----------|----------|----------|----------|
| 1944 | 0.0528   | 0.02923  | 0.0361   | 0.00343  | 0.01387  | 1.77E-04 | 4.80E-04 | 7.56E-04 |
| 1968 | 0.0475   | 0.02514  | 0.03156  | 0.00295  | 0.01228  | 6.51E-04 | 3.21E-04 | 6.51E-04 |
| 1992 | 0.0425   | 0.02129  | 0.02726  | 0.00255  | 0.01078  | 5.61E-04 | 5.61E-04 | 5.61E-04 |
| 2016 | 0.0377   | 0.01768  | 0.02322  | 0.00219  | 0.00936  | 4.83E-04 | 4.83E-04 | 4.83E-04 |
| 2040 | 0.0331   | 0.01432  | 0.01943  | 0.00189  | 0.00802  | 4.16E-04 | 4.16E-04 | 4.16E-04 |
| 2064 | 0.0289   | 0.0112   | 0.0159   | 0.00163  | 0.00677  | 3.59E-04 | 3.59E-04 | 3.59E-04 |
| 2088 | 0.0248   | 0.00833  | 0.01263  | 0.0014   | 0.0056   | 3.09E-04 | 3.09E-04 | 3.09E-04 |
| 2112 | 0.0211   | 0.00571  | 0.00961  | 0.00121  | 0.00451  | 2.66E-04 | 2.66E-04 | 2.66E-04 |
| 2136 | 0.0175   | 0.00334  | 0.00684  | 0.00104  | 0.00351  | 2.29E-04 | 2.29E-04 | 2.29E-04 |
| 2160 | 0.0142   | 0.00122  | 0.00434  | 8.96E-04 | 0.00259  | 1.97E-04 | 1.97E-04 | 1.97E-04 |
| 2184 | 0.0112   | 6.48E-04 | 0.00209  | 7.72E-04 | 0.00175  | 1.70E-04 | 1.70E-04 | 1.70E-04 |
| 2208 | 0.00843  | 6.65E-04 | 9.86E-05 | 6.65E-04 | 9.98E-04 | 1.47E-04 | 1.47E-04 | 1.47E-04 |
| 2232 | 0.00589  | 5.73E-04 | 5.73E-04 | 5.73E-04 | 3.27E-04 | 1.26E-04 | 1.26E-04 | 1.26E-04 |
| 2256 | 0.0036   | 4.93E-04 | 4.93E-04 | 4.93E-04 | 1.09E-04 | 1.09E-04 | 1.09E-04 | 1.09E-04 |
| 2280 | 0.00155  | 4.25E-04 | 4.25E-04 | 4.25E-04 | 9.36E-05 | 9.36E-05 | 9.36E-05 | 9.36E-05 |
| 2304 | 2.51E-04 | 3.66E-04 | 3.66E-04 | 3.66E-04 | 8.06E-05 | 8.06E-05 | 8.06E-05 | 8.06E-05 |
| 2328 | 3.15E-04 | 3.15E-04 | 3.15E-04 | 3.15E-04 | 6.95E-05 | 6.95E-05 | 6.95E-05 | 6.95E-05 |
| 2352 | 2.71E-04 | 2.71E-04 | 2.71E-04 | 2.71E-04 | 5.98E-05 | 5.98E-05 | 5.98E-05 | 5.98E-05 |
| 2376 | 2.34E-04 | 2.34E-04 | 2.34E-04 | 2.34E-04 | 5.15E-05 | 5.15E-05 | 5.15E-05 | 5.15E-05 |
| 2400 | 2.01E-04 | 2.01E-04 | 2.01E-04 | 2.01E-04 | 4.44E-05 | 4.44E-05 | 4.44E-05 | 4.44E-05 |
| 2424 | 1.74E-04 | 1.74E-04 | 1.74E-04 | 1.74E-04 | 3.82E-05 | 3.82E-05 | 3.82E-05 | 3.82E-05 |
| 2448 | 1.49E-04 | 1.49E-04 | 1.49E-04 | 1.49E-04 | 3.29E-05 | 3.29E-05 | 3.29E-05 | 3.29E-05 |
| 2472 | 1.29E-04 | 1.29E-04 | 1.29E-04 | 1.29E-04 | 2.84E-05 | 2.84E-05 | 2.84E-05 | 2.84E-05 |
| 2496 | 1.11E-04 | 1.11E-04 | 1.11E-04 | 1.11E-04 | 2.44E-05 | 2.44E-05 | 2.44E-05 | 2.44E-05 |
| 2520 | 9.55E-05 | 9.55E-05 | 9.55E-05 | 9.55E-05 | 2.11E-05 | 2.11E-05 | 2.11E-05 | 2.11E-05 |
| 2544 | 8.23E-05 | 8.23E-05 | 8.23E-05 | 8.23E-05 | 1.81E-05 | 1.81E-05 | 1.81E-05 | 1.81E-05 |
| 2568 | 7.09E-05 | 7.09E-05 | 7.09E-05 | 7.09E-05 | 1.56E-05 | 1.56E-05 | 1.56E-05 | 1.56E-05 |
| 2592 | 6.10E-05 | 6.10E-05 | 6.10E-05 | 6.10E-05 | 1.35E-05 | 1.35E-05 | 1.35E-05 | 1.35E-05 |
| 2616 | 5.26E-05 | 5.26E-05 | 5.26E-05 | 5.26E-05 | 1.16E-05 | 1.16E-05 | 1.16E-05 | 1.16E-05 |
| 2640 | 4.53E-05 | 4.53E-05 | 4.53E-05 | 4.53E-05 | 9.98E-06 | 9.98E-06 | 9.98E-06 | 9.98E-06 |
| 2664 | 3.90E-05 | 3.90E-05 | 3.90E-05 | 3.90E-05 | 8.60E-06 | 8.60E-06 | 8.60E-06 | 8.60E-06 |
| 2688 | 3.36E-05 | 3.36E-05 | 3.36E-05 | 3.36E-05 | 7.41E-06 | 7.41E-06 | 7.41E-06 | 7.41E-06 |
| 2712 | 2.89E-05 | 2.89E-05 | 2.89E-05 | 2.89E-05 | 6.38E-06 | 6.38E-06 | 6.38E-06 | 6.38E-06 |
| 2736 | 2.49E-05 | 2.49E-05 | 2.49E-05 | 2.49E-05 | 5.49E-06 | 5.49E-06 | 5.49E-06 | 5.49E-06 |
| 2760 | 2.15E-05 | 2.15E-05 | 2.15E-05 | 2.15E-05 | 4.73E-06 | 4.73E-06 | 4.73E-06 | 4.73E-06 |
| 2784 | 1.85E-05 | 1.85E-05 | 1.85E-05 | 1.85E-05 | 4.08E-06 | 4.08E-06 | 4.08E-06 | 4.08E-06 |
| 2800 | 1.67E-05 | 1.67E-05 | 1.67E-05 | 1.67E-05 | 3.69E-06 | 3.69E-06 | 3.69E-06 | 3.69E-06 |

Table S10: Data of Figure 5(a).

| data                     |                   |                          |           |                          |                   |          | <input type="checkbox"/> |
|--------------------------|-------------------|--------------------------|-----------|--------------------------|-------------------|----------|--------------------------|
| $T$                      | $\phi_{eq}$       |                          |           |                          |                   |          | <input type="checkbox"/> |
| 328                      | 0.586             | 0.586                    | 0.586     | 0.586                    | 0.586             | 0.586    | <input type="checkbox"/> |
| 333                      | 0.52253           | 0.4916                   | 0.53165   | 0.52116                  | 0.49415           | 0.55678  | <input type="checkbox"/> |
| 338                      | 0.48328           | 0.36621                  | 0.50568   | 0.47896                  | 0.34601           | 0.49185  | <input type="checkbox"/> |
| 340.5                    | 0.40375           | 0.28892                  | 0.35547   | 0.41559                  | 0.31608           | 0.36965  | <input type="checkbox"/> |
| 343                      | 0.16645           | 0.23042                  | 0.20833   | 0.19351                  | 0.2476            | 0.18856  | <input type="checkbox"/> |
| 345.5                    | 0.11514           | 0.1781                   | 0.13388   | 0.13966                  | 0.17461           | 0.12384  | <input type="checkbox"/> |
| 353                      | 0.09974           | 0.10285                  | 0.10729   | 0.11111                  | 0.09859           | 0.08613  | <input type="checkbox"/> |
| 355.5                    | 0.0609            | 0.07352                  | 0.0709    | 0.06947                  | 0.07214           | 0.06082  | <input type="checkbox"/> |
| 358                      | 0.05972           | 0.07106                  | 0.0638    | 0.06363                  | 0.06701           | 0.05576  | <input type="checkbox"/> |
| $T$                      | $\phi_{eq}$       |                          |           |                          |                   |          | <input type="checkbox"/> |
| 328                      | 0.586             | 0.586                    | 0.586     | 0.586                    | 0.586             | 0.586    | <input type="checkbox"/> |
| 333                      | 0.51198           | 0.56331                  | 0.52266   | 0.51591                  | 0.51846           | 0.49183  | <input type="checkbox"/> |
| 338                      | 0.47824           | 0.51559                  | 0.36891   | 0.43489                  | 0.4317            | 0.47046  | <input type="checkbox"/> |
| 340.5                    | 0.42592           | 0.4994                   | 0.30052   | 0.41153                  | 0.39482           | 0.3965   | <input type="checkbox"/> |
| 343                      | 0.28968           | 0.43723                  | 0.25341   | 0.28262                  | 0.34438           | 0.20075  | <input type="checkbox"/> |
| 345.5                    | 0.23186           | 0.18965                  | 0.21431   | 0.12279                  | 0.15949           | 0.12665  | <input type="checkbox"/> |
| 353                      | 0.10362           | 0.10908                  | 0.08422   | 0.08428                  | 0.10903           | 0.10317  | <input type="checkbox"/> |
| 355.5                    | 0.05323           | 0.07928                  | 0.06373   | 0.06133                  | 0.08271           | 0.07773  | <input type="checkbox"/> |
| 358                      | 0.04292           | <input type="checkbox"/> | 0.05164   | 0.05315                  | 0.0641            | 0.07541  | <input type="checkbox"/> |
| <input type="checkbox"/> | modified logistic | constant                 | Eqn. (24) | <input type="checkbox"/> | modified logistic | constant | Eqn. (24)                |
| $T$                      | $\phi_{eq}$       |                          |           | $T$                      | $\phi_{eq}$       |          |                          |
| 328                      | 0.58208           | 0.16869                  | 0.58056   | 343.6                    | 0.25413           | 0.09907  | 0.19625                  |
| 329.2                    | 0.58208           | 0.16869                  | 0.57262   | 344.8                    | 0.19513           | 0.09502  | 0.16272                  |
| 330.4                    | 0.58208           | 0.16869                  | 0.56464   | 346                      | 0.15134           | 0.09136  | 0.14341                  |
| 331.6                    | 0.58208           | 0.16869                  | 0.55661   | 347.2                    | 0.12188           | 0.08806  | 0.13078                  |
| 332.8                    | 0.58208           | 0.16869                  | 0.5484    | 348.4                    | 0.10341           | 0.08505  | 0.12097                  |
| 334                      | 0.57623           | 0.158                    | 0.53977   | 349.6                    | 0.09218           | 0.08231  | 0.1123                   |
| 335.2                    | 0.56788           | 0.14671                  | 0.53008   | 350.8                    | 0.08525           | 0.07979  | 0.10407                  |
| 336.4                    | 0.55629           | 0.1369                   | 0.51773   | 352                      | 0.08071           | 0.07748  | 0.09603                  |
| 337.6                    | 0.53806           | 0.12838                  | 0.49908   | 353.2                    | 0.07747           | 0.07534  | 0.08805                  |
| 338.8                    | 0.50803           | 0.12094                  | 0.46686   | 354.4                    | 0.07496           | 0.07336  | 0.08011                  |
| 340                      | 0.46122           | 0.11443                  | 0.41147   | 355.6                    | 0.07288           | 0.07152  | 0.07217                  |
| 341.2                    | 0.39752           | 0.10869                  | 0.33296   | 356.8                    | 0.07105           | 0.0698   | 0.06424                  |
| 342.4                    | 0.32462           | 0.1036                   | 0.25346   | 358                      | 0.06941           | 0.0682   | 0.05631                  |

Table S11: Data of Figure 5(b-c).

| Fig5(b)   |                   |           | Fig5(c)           |           |
|-----------|-------------------|-----------|-------------------|-----------|
| $\square$ | modified logistic | Eqn. (24) | modified logistic | Eqn. (24) |
| $T$       | $\nu^*$           | $\nu^*$   | $1/\nu^*$         | $1/\nu^*$ |
| 328       | 0.23              | 0.22769   | 4.34783           | 4.39194   |
| 328.9     | 0.23              | 0.21884   | 4.34783           | 4.56958   |
| 329.8     | 0.23              | 0.21028   | 4.34783           | 4.75556   |
| 330.7     | 0.23              | 0.20199   | 4.34783           | 4.95076   |
| 331.6     | 0.23              | 0.19393   | 4.34783           | 5.15651   |
| 332.5     | 0.23              | 0.18604   | 4.34783           | 5.37522   |
| 333.4     | 0.22967           | 0.18094   | 4.35412           | 5.52677   |
| 334.3     | 0.2283            | 0.17887   | 4.38027           | 5.59072   |
| 335.2     | 0.22548           | 0.17592   | 4.43492           | 5.68432   |
| 336.1     | 0.22015           | 0.17135   | 4.54242           | 5.83609   |
| 337       | 0.21071           | 0.16382   | 4.74581           | 6.1042    |
| 337.9     | 0.19531           | 0.15132   | 5.12001           | 6.6083    |
| 338.8     | 0.1726            | 0.13163   | 5.79363           | 7.59682   |
| 339.7     | 0.14319           | 0.10434   | 6.98378           | 9.58435   |
| 340.6     | 0.11051           | 0.07363   | 9.04885           | 13.58096  |
| 341.5     | 0.07961           | 0.04713   | 12.5608           | 21.21979  |
| 342.4     | 0.05439           | 0.02941   | 18.3844           | 34.00514  |
| 343.3     | 0.03609           | 0.01949   | 27.71166          | 51.29971  |
| 344.2     | 0.02385           | 0.01435   | 41.92756          | 69.69475  |
| 345.1     | 0.0161            | 0.01166   | 62.12397          | 85.78611  |
| 346       | 0.01134           | 0.01015   | 88.21876          | 98.51249  |
| 346.9     | 0.00846           | 0.00921   | 118.1762          | 108.6188  |
| 347.8     | 0.00674           | 0.00852   | 148.3074          | 117.3187  |
| 348.7     | 0.00572           | 0.00796   | 174.8895          | 125.6376  |
| 349.6     | 0.00511           | 0.00745   | 195.7942          | 134.3167  |
| 350.5     | 0.00474           | 0.00695   | 210.817           | 143.904   |
| 351.4     | 0.00453           | 0.00646   | 220.9395          | 154.8606  |
| 352.3     | 0.0044            | 0.00596   | 227.4742          | 167.6472  |
| 353.2     | 0.00432           | 0.00547   | 231.5808          | 182.7942  |
| 354.1     | 0.00427           | 0.00498   | 234.12            | 200.9717  |
| 355       | 0.00424           | 0.00448   | 235.6757          | 223.0751  |
| 355.9     | 0.00423           | 0.00399   | 236.624           | 250.3492  |
| 356.8     | 0.00422           | 0.00351   | 237.2007          | 284.5829  |
| 357.7     | 0.00421           | 0.00304   | 237.5511          | 328.4374  |
| 358       | 0.00421           | 0.00289   | 237.6341          | 345.8459  |

Table S12: Data of Figure 6.

| $\square$ | Eqn.<br>(24) | modified logistic | $\square$ | Eqn.<br>(24) | modified logistic |
|-----------|--------------|-------------------|-----------|--------------|-------------------|
| $t^*$     | $R^*$        |                   | $t^*$     | $R^*$        |                   |
| 0         | 1            | 1                 | 1440      | 2.18         | 2.03              |
| 80        | 1.01158      | 0.99973           | 1520      | 2.18         | 2.03              |
| 160       | 1.02439      | 1.00245           | 1600      | 2.18         | 2.03              |
| 240       | 1.0422       | 1.01721           | 1680      | 2.18         | 2.03              |
| 320       | 1.09761      | 1.06248           | 1760      | 2.18         | 2.03              |
| 400       | 1.28728      | 1.19085           | 1840      | 2.18         | 2.03              |
| 480       | 1.51552      | 1.41603           | 1920      | 2.18         | 2.03              |
| 560       | 1.63652      | 1.66109           | 2000      | 2.18         | 2.03              |
| 640       | 1.71773      | 1.82711           | 2080      | 2.18         | 2.03              |
| 720       | 1.79719      | 1.91264           | 2160      | 2.18         | 2.03              |
| 800       | 1.88454      | 1.95969           | 2240      | 2.18         | 2.03              |
| 880       | 1.98367      | 1.99149           | 2320      | 2.18         | 2.03              |
| 960       | 2.09811      | 2.01643           | 2400      | 2.18         | 2.03              |
| 1040      | 2.18         | 2.03              | 2480      | 2.18         | 2.03              |
| 1120      | 2.18         | 2.03              | 2560      | 2.18         | 2.03              |
| 1200      | 2.18         | 2.03              | 2640      | 2.18         | 2.03              |
| 1280      | 2.18         | 2.03              | 2720      | 2.18         | 2.03              |
| 1360      | 2.18         | 2.03              | 2800      | 2.18         | 2.03              |

Table S13: Data of Figure 7(a).

| $\square$ | a=0.3                       | a=0.5     | a=0.7     | a=0.9     |
|-----------|-----------------------------|-----------|-----------|-----------|
| $t^*$     | $\frac{R - R_0}{R_f - R_0}$ |           |           |           |
| 0         | 0                           | 0         | 0         | 0         |
| 114       | -0.00374                    | -0.00347  | -0.00347  | -0.00347  |
| 234       | -0.00374                    | -0.00347  | -0.00347  | -0.00347  |
| 240       | -0.00374                    | -0.00347  | -0.00347  | -0.00347  |
| 354       | -0.00374                    | -0.00347  | -0.00347  | -0.00347  |
| 474       | -0.00118                    | -0.00108  | -0.00106  | -0.00104  |
| 480       | -1.49E-04                   | -1.01E-04 | -5.83E-05 | -9.86E-06 |
| 594       | 0.022                       | 0.02623   | 0.03845   | 0.06275   |
| 714       | 0.05938                     | 0.11696   | 0.26212   | 0.46129   |
| 720       | 0.06197                     | 0.12501   | 0.28084   | 0.48453   |
| 834       | 0.13152                     | 0.34822   | 0.62702   | 0.7316    |
| 954       | 0.25407                     | 0.62188   | 0.78852   | 0.80731   |
| 960       | 0.26146                     | 0.63325   | 0.79288   | 0.81006   |
| 1074      | 0.41604                     | 0.79053   | 0.85227   | 0.85557   |
| 1194      | 0.58434                     | 0.87223   | 0.89348   | 0.89417   |

|      |         |         |         |         |
|------|---------|---------|---------|---------|
| 1200 | 0.59231 | 0.87509 | 0.89526 | 0.8959  |
| 1314 | 0.7284  | 0.9176  | 0.92539 | 0.92556 |
| 1434 | 0.83599 | 0.94768 | 0.95076 | 0.95081 |
| 1440 | 0.84042 | 0.94894 | 0.95187 | 0.95193 |
| 1554 | 0.91008 | 0.96937 | 0.97062 | 0.97063 |
| 1674 | 0.95873 | 0.98509 | 0.98555 | 0.98556 |
| 1680 | 0.96063 | 0.98574 | 0.98618 | 0.98618 |
| 1794 | 0.98898 | 0.99584 | 0.99595 | 0.99595 |
| 1914 | 1       | 1       | 1       | 1       |
| 1920 | 1       | 1       | 1       | 1       |
| 2034 | 1       | 1       | 1       | 1       |
| 2154 | 1       | 1       | 1       | 1       |
| 2160 | 1       | 1       | 1       | 1       |
| 2274 | 1       | 1       | 1       | 1       |
| 2394 | 1       | 1       | 1       | 1       |
| 2400 | 1       | 1       | 1       | 1       |

Table S14: Data of Figure 7(b).

| $\square$        | a=0.3                       | $\square$        | a=0.5                       | $\square$        | a=0.7                       | $\square$        | a=0.9                       |
|------------------|-----------------------------|------------------|-----------------------------|------------------|-----------------------------|------------------|-----------------------------|
| $k_G(t^* - t_G)$ | $\frac{R - R_0}{R_f - R_0}$ | $k_G(t^* - t_G)$ | $\frac{R - R_0}{R_f - R_0}$ | $k_G(t^* - t_G)$ | $\frac{R - R_0}{R_f - R_0}$ | $k_G(t^* - t_G)$ | $\frac{R - R_0}{R_f - R_0}$ |
| -641.7           | 0                           | -837             | 0                           | -1022.58         | 0                           | -1207.36         | 0                           |
| -580.32          | -0.00374                    | -738             | -0.00347                    | -885.96          | 0.00347                     | -1033.12         | 0.00347                     |
| -518.32          | -0.00374                    | -638             | -0.00347                    | -747.96          | 0.00347                     | -857.12          | 0.00347                     |
| -456.32          | -0.00374                    | -538             | -0.00347                    | -609.96          | 0.00347                     | -681.12          | 0.00347                     |
| -394.32          | -0.00374                    | -438             | -0.00347                    | -471.96          | 0.00347                     | -505.12          | 0.00347                     |
| -332.32          | 0.00406                     | -338             | 0.00399                     | -333.96          | 0.00429                     | -329.12          | 0.00469                     |
| -270.32          | 0.02434                     | -238             | 0.03006                     | -195.96          | 0.04638                     | -153.12          | 0.0794                      |
| -208.32          | 0.05526                     | -138             | 0.10444                     | -57.96           | 0.23211                     | 22.88            | 0.42093                     |
| -146.32          | 0.10903                     | -38              | 0.2788                      | 80.04            | 0.55075                     | 198.88           | 0.69665                     |
| -84.32           | 0.19687                     | 62               | 0.51573                     | 218.04           | 0.74236                     | 374.88           | 0.78204                     |
| -22.32           | 0.31842                     | 162              | 0.70675                     | 356.04           | 0.81999                     | 550.88           | 0.82894                     |
| 39.68            | 0.45895                     | 262              | 0.81658                     | 494.04           | 0.86378                     | 726.88           | 0.86598                     |
| 101.68           | 0.59758                     | 362              | 0.87695                     | 632.04           | 0.89643                     | 902.88           | 0.89705                     |
| 163.68           | 0.71775                     | 462              | 0.91456                     | 770.04           | 0.923                       | 1078.88          | 0.92319                     |
| 225.68           | 0.8125                      | 562              | 0.9411                      | 908.04           | 0.94496                     | 1254.88          | 0.94503                     |

|        |         |      |         |         |         |         |         |
|--------|---------|------|---------|---------|---------|---------|---------|
| 287.68 | 0.88278 | 662  | 0.96115 | 1046.04 | 0.96297 | 1430.88 | 0.963   |
| 349.68 | 0.93299 | 762  | 0.97657 | 1184.04 | 0.97741 | 1606.88 | 0.97742 |
| 411.68 | 0.96779 | 862  | 0.98821 | 1322.04 | 0.98856 | 1782.88 | 0.98857 |
| 473.68 | 0.99083 | 962  | 0.99653 | 1460.04 | 0.99662 | 1958.88 | 0.99662 |
| 535.68 | 1       | 1062 | 1       | 1598.04 | 1       | 2134.88 | 1       |
| 597.68 | 1       | 1162 | 1       | 1736.04 | 1       | 2310.88 | 1       |
| 659.68 | 1       | 1262 | 1       | 1874.04 | 1       | 2486.88 | 1       |
| 721.68 | 1       | 1362 | 1       | 2012.04 | 1       | 2662.88 | 1       |
| 783.68 | 1       | 1462 | 1       | 2150.04 | 1       | 2838.88 | 1       |
| 845.68 | 1       | 1562 | 1       | 2288.04 | 1       | 3014.88 | 1       |
| 846.3  | 1       | 1563 | 1       | 2289.42 | 1       | 3016.64 | 1       |

Table S15: Data of Figure 7(c).

|            |          |          |        |         |
|------------|----------|----------|--------|---------|
| $v_\infty$ | 3.80E-04 | 7.70E-04 | 0.0025 | 0.0042  |
| $a$        | 0.61645  | 0.58471  | 0.5353 | 0.51459 |

Table S16: Data of Figure 7(d).

| $\square$ | a=0.51                      | a=0.54    | a=0.58    | a=0.62    |
|-----------|-----------------------------|-----------|-----------|-----------|
| $t^*$     | $\frac{R - R_0}{R_f - R_0}$ |           |           |           |
| 0         | 0                           | 0         | 0         | 0         |
| 152       | -0.0023                     | -0.00192  | -0.00132  | -0.00107  |
| 312       | -0.0023                     | -0.00192  | -0.00132  | -0.00107  |
| 320       | -0.0023                     | -0.00192  | -0.00132  | -0.00107  |
| 472       | -0.00114                    | -9.46E-04 | -6.50E-04 | -5.28E-04 |
| 632       | 0.02966                     | 0.02624   | 0.02083   | 0.01865   |
| 640       | 0.03299                     | 0.02933   | 0.02353   | 0.02121   |
| 792       | 0.18913                     | 0.17759   | 0.15793   | 0.1496    |
| 952       | 0.5314                      | 0.51316   | 0.47527   | 0.45628   |
| 960       | 0.54884                     | 0.53095   | 0.49333   | 0.47428   |
| 1112      | 0.79484                     | 0.79033   | 0.77778   | 0.77019   |
| 1272      | 0.90178                     | 0.90343   | 0.90607   | 0.90746   |
| 1280      | 0.90501                     | 0.90674   | 0.90959   | 0.91109   |
| 1432      | 0.94927                     | 0.95105   | 0.95441   | 0.95617   |
| 1592      | 0.97647                     | 0.97746   | 0.97932   | 0.98027   |
| 1600      | 0.97751                     | 0.97846   | 0.98025   | 0.98116   |
| 1752      | 0.99306                     | 0.99338   | 0.99396   | 0.99425   |
| 1912      | 1                           | 1         | 1         | 1         |
| 1920      | 1                           | 1         | 1         | 1         |
| 2072      | 1                           | 1         | 1         | 1         |
| 2232      | 1                           | 1         | 1         | 1         |
| 2240      | 1                           | 1         | 1         | 1         |
| 2392      | 1                           | 1         | 1         | 1         |

|      |   |   |   |   |
|------|---|---|---|---|
| 2552 | 1 | 1 | 1 | 1 |
| 2560 | 1 | 1 | 1 | 1 |
| 2712 | 1 | 1 | 1 | 1 |
| 2800 | 1 | 1 | 1 | 1 |

Table S17: Data of Figure 8(a).

| $\square$ | $\nu_\infty = 0.00038$ | $\nu_\infty = 0.00077$ | $\nu_\infty = 0.0025$ | $\nu_\infty = 0.012$ |
|-----------|------------------------|------------------------|-----------------------|----------------------|
| $t^*$     | $R^*$                  |                        |                       |                      |
| 0         | 1                      | 1                      | 1                     | 1                    |
| 152       | 0.99759                | 0.99759                | 0.99759               | 0.99761              |
| 312       | 0.99759                | 0.99759                | 0.99759               | 0.99761              |
| 320       | 0.99759                | 0.99759                | 0.99759               | 0.99761              |
| 472       | 0.99881                | 0.99881                | 0.99881               | 0.99881              |
| 632       | 1.03023                | 1.03022                | 1.03008               | 1.02917              |
| 640       | 1.03355                | 1.03354                | 1.03338               | 1.03232              |
| 792       | 1.19059                | 1.19004                | 1.18714               | 1.17139              |
| 952       | 1.60514                | 1.59592                | 1.55813               | 1.42374              |
| 960       | 1.63182                | 1.62143                | 1.57935               | 1.43435              |
| 1112      | 2.19016                | 2.12227                | 1.92677               | 1.56666              |
| 1272      | 2.70699                | 2.50356                | 2.10922               | 1.62333              |
| 1280      | 2.72695                | 2.51649                | 2.11467               | 1.62523              |
| 1432      | 2.99656                | 2.68159                | 2.18521               | 1.65332              |
| 1592      | 3.12782                | 2.76036                | 2.2237                | 1.67251              |
| 1600      | 3.13205                | 2.76298                | 2.22511               | 1.67327              |
| 1752      | 3.18842                | 2.79907                | 2.24556               | 1.68478              |
| 1912      | 3.21                   | 2.81361                | 2.25443               | 1.69                 |
| 1920      | 3.21                   | 2.81361                | 2.25443               | 1.69                 |
| 2072      | 3.21                   | 2.81361                | 2.25443               | 1.69                 |
| 2232      | 3.21                   | 2.81361                | 2.25443               | 1.69                 |
| 2240      | 3.21                   | 2.81361                | 2.25443               | 1.69                 |
| 2392      | 3.21                   | 2.81361                | 2.25443               | 1.69                 |
| 2552      | 3.21                   | 2.81361                | 2.25443               | 1.69                 |
| 2560      | 3.21                   | 2.81361                | 2.25443               | 1.69                 |
| 2712      | 3.21                   | 2.81361                | 2.25443               | 1.69                 |
| 2800      | 3.21                   | 2.81361                | 2.25443               | 1.69                 |

Table S18: Data of Figure 8(b).

| $\nu_\infty$ | $\frac{R_f}{R_0}$ |
|--------------|-------------------|
| 0.012        | 1.69              |
| 0.0025       | 2.25443           |



|          |         |
|----------|---------|
| 7.70E-04 | 2.81361 |
| 3.80E-04 | 3.21    |

Table S19: Data of Figure 9(a).

|       | $\phi_0 = 0.5$              | $\phi_0 = 0.55$ | $\phi_0 = 0.6$ | $\phi_0 = 0.65$ |
|-------|-----------------------------|-----------------|----------------|-----------------|
| $t^*$ | $\frac{R - R_0}{R_f - R_0}$ |                 |                |                 |
| 100   | -0.00413                    | -0.0038         | -0.00354       | -0.00332        |
| 200   | -0.00413                    | -0.0038         | -0.00354       | -0.00332        |
| 300   | -0.00413                    | -0.0038         | -0.00354       | -0.00332        |
| 400   | -0.00413                    | -0.0038         | -0.00354       | -0.00332        |
| 500   | 0.00792                     | 0.00541         | 0.00356        | 0.00217         |
| 600   | 0.0454                      | 0.03579         | 0.02842        | 0.02261         |
| 700   | 0.14048                     | 0.11869         | 0.10078        | 0.08578         |
| 800   | 0.343                       | 0.30569         | 0.2716         | 0.24067         |
| 900   | 0.57895                     | 0.54458         | 0.50713        | 0.4681          |
| 1000  | 0.73906                     | 0.72317         | 0.70146        | 0.67438         |
| 1100  | 0.826                       | 0.82239         | 0.81478        | 0.80297         |
| 1200  | 0.87707                     | 0.87809         | 0.87679        | 0.87311         |
| 1300  | 0.91201                     | 0.91415         | 0.91494        | 0.91441         |
| 1400  | 0.93835                     | 0.94038         | 0.94159        | 0.94203         |
| 1500  | 0.95898                     | 0.96053         | 0.96157        | 0.96217         |
| 1600  | 0.97516                     | 0.97616         | 0.97688        | 0.97734         |
| 1700  | 0.9875                      | 0.98802         | 0.98841        | 0.98867         |
| 1800  | 0.99635                     | 0.99651         | 0.99662        | 0.99671         |
| 1900  | 1                           | 1               | 1              | 1               |
| 2000  | 1                           | 1               | 1              | 1               |
| 2100  | 1                           | 1               | 1              | 1               |
| 2200  | 1                           | 1               | 1              | 1               |
| 2300  | 1                           | 1               | 1              | 1               |
| 2400  | 1                           | 1               | 1              | 1               |

Table S20: Data of Figure 9(b).

|             | $\phi_0 = 0.5$              |             | $\phi_0 = 0.55$             |             | $\phi_0 = 0.6$              |             | $\phi_0 = 0.65$             |  |
|-------------|-----------------------------|-------------|-----------------------------|-------------|-----------------------------|-------------|-----------------------------|--|
| $t^* - t_G$ | $\frac{R - R_0}{R_f - R_0}$ | $t^* - t_G$ | $\frac{R - R_0}{R_f - R_0}$ | $t^* - t_G$ | $\frac{R - R_0}{R_f - R_0}$ | $t^* - t_G$ | $\frac{R - R_0}{R_f - R_0}$ |  |
| -710        | -0.00413                    | -726        | -0.0038                     | -742        | -0.00354                    | -757        | -0.00332                    |  |
| -610        | -0.00413                    | -626        | -0.0038                     | -642        | -0.00354                    | -657        | -0.00332                    |  |

|      |          |      |         |      |          |      |          |
|------|----------|------|---------|------|----------|------|----------|
| -510 | -0.00413 | -526 | -0.0038 | -542 | -0.00354 | -557 | -0.00332 |
| -410 | -0.00413 | -426 | -0.0038 | -442 | -0.00354 | -457 | -0.00332 |
| -310 | 0.00792  | -326 | 0.00541 | -342 | 0.00356  | -357 | 0.00217  |
| -210 | 0.0454   | -226 | 0.03579 | -242 | 0.02842  | -257 | 0.02261  |
| -110 | 0.14048  | -126 | 0.11869 | -142 | 0.10078  | -157 | 0.08578  |
| -10  | 0.343    | -26  | 0.30569 | -42  | 0.2716   | -57  | 0.24067  |
| 90   | 0.57895  | 74   | 0.54458 | 58   | 0.50713  | 43   | 0.4681   |
| 190  | 0.73906  | 174  | 0.72317 | 158  | 0.70146  | 143  | 0.67438  |
| 290  | 0.826    | 274  | 0.82239 | 258  | 0.81478  | 243  | 0.80297  |
| 390  | 0.87707  | 374  | 0.87809 | 358  | 0.87679  | 343  | 0.87311  |
| 490  | 0.91201  | 474  | 0.91415 | 458  | 0.91494  | 443  | 0.91441  |
| 590  | 0.93835  | 574  | 0.94038 | 558  | 0.94159  | 543  | 0.94203  |
| 690  | 0.95898  | 674  | 0.96053 | 658  | 0.96157  | 643  | 0.96217  |
| 790  | 0.97516  | 774  | 0.97616 | 758  | 0.97688  | 743  | 0.97734  |
| 890  | 0.9875   | 874  | 0.98802 | 858  | 0.98841  | 843  | 0.98867  |
| 990  | 0.99635  | 974  | 0.99651 | 958  | 0.99662  | 943  | 0.99671  |
| 1090 | 1        | 1074 | 1       | 1058 | 1        | 1043 | 1        |
| 1190 | 1        | 1174 | 1       | 1158 | 1        | 1143 | 1        |
| 1290 | 1        | 1274 | 1       | 1258 | 1        | 1243 | 1        |
| 1390 | 1        | 1374 | 1       | 1358 | 1        | 1343 | 1        |
| 1490 | 1        | 1474 | 1       | 1458 | 1        | 1443 | 1        |
| 1590 | 1        | 1574 | 1       | 1558 | 1        | 1543 | 1        |

Table S21: Data of Figure 9(c).

|          | $\nu_\infty = 0.00038$ | $\nu_\infty = 0.00077$ | $\nu_\infty = 0.0025$ | $\nu_\infty = 0.012$ |
|----------|------------------------|------------------------|-----------------------|----------------------|
| $\phi_0$ | $t_G$                  |                        |                       |                      |
| 0.5      | 968                    | 932                    | 877                   | 810                  |
| 0.55     | 989                    | 953                    | 895                   | 826                  |
| 0.6      | 1010                   | 973                    | 914                   | 842                  |
| 0.65     | 1031                   | 993                    | 932                   | 857                  |

Table S22: Data of Figure 9(d).

| $\nu_\infty^{-k_2} \phi_0$ | $t_G$    |                  | $\nu_\infty^{-k_2} \phi_0$ | $t_G$    |                  |
|----------------------------|----------|------------------|----------------------------|----------|------------------|
|                            | Eqn.(31) | data in Fig9 (c) |                            | Eqn.(31) | data in Fig9 (c) |
| 2.65495                    | 960.7695 | 968              | 1.78077                    | 868.9804 | 877              |
| 2.92044                    | 988.6464 | 989              | 1.95884                    | 887.6784 | 895              |
| 3.18594                    | 1016.523 | 1010             | 2.13692                    | 906.3765 | 914              |
| 3.45143                    | 1044.4   | 1031             | 2.315                      | 925.0745 | 932              |
| 2.28578                    | 922.0067 | 932              | 1.27698                    | 816.0827 | 810              |

|         |          |     |         |          |     |
|---------|----------|-----|---------|----------|-----|
| 2.51436 | 946.0073 | 953 | 1.40468 | 829.491  | 826 |
| 2.74293 | 970.008  | 973 | 1.53237 | 842.8993 | 842 |
| 2.97151 | 994.0086 | 993 | 1.66007 | 856.3076 | 857 |

Table S23: Data of Figure 10(a).

|       | $T_g = 327$                 | $T_g = 331$ | $T_g = 335$ | $T_g = 339$ |
|-------|-----------------------------|-------------|-------------|-------------|
| $t^*$ | $\frac{R - R_0}{R_f - R_0}$ |             |             |             |
| 0     | 0                           | 0           | 0           | 0           |
| 100   | -9.51E-04                   | -9.86E-04   | -0.00103    | -0.00109    |
| 200   | 0.00625                     | -9.86E-04   | -0.00103    | -0.00109    |
| 300   | 0.03235                     | 0.0048      | -0.00103    | -0.00109    |
| 400   | 0.11953                     | 0.02382     | 0.00312     | -0.00109    |
| 500   | 0.28871                     | 0.08859     | 0.01596     | 0.00133     |
| 600   | 0.51559                     | 0.22319     | 0.05895     | 0.0098      |
| 700   | 0.71965                     | 0.4188      | 0.15729     | 0.03494     |
| 800   | 0.83498                     | 0.63004     | 0.312       | 0.09888     |
| 900   | 0.88828                     | 0.7873      | 0.5026      | 0.21008     |
| 1000  | 0.91716                     | 0.87195     | 0.68512     | 0.36049     |
| 1100  | 0.93679                     | 0.91472     | 0.81571     | 0.53007     |
| 1200  | 0.95198                     | 0.93969     | 0.89079     | 0.68853     |
| 1300  | 0.96435                     | 0.95683     | 0.93203     | 0.80981     |
| 1400  | 0.97454                     | 0.96977     | 0.95656     | 0.88901     |
| 1500  | 0.98288                     | 0.97989     | 0.97269     | 0.93713     |
| 1600  | 0.98957                     | 0.98783     | 0.98403     | 0.96635     |
| 1700  | 0.99473                     | 0.99388     | 0.99214     | 0.98448     |
| 1800  | 0.99846                     | 0.99821     | 0.99773     | 0.99572     |
| 1900  | 1                           | 1           | 1           | 1           |
| 2000  | 1                           | 1           | 1           | 1           |
| 2100  | 1                           | 1           | 1           | 1           |
| 2200  | 1                           | 1           | 1           | 1           |
| 2300  | 1                           | 1           | 1           | 1           |
| 2400  | 1                           | 1           | 1           | 1           |

Table S24: Data of Figure 10(b).

|             | $T_g = 327$                 | $T_g = 331$ | $T_g = 335$                 | $T_g = 339$ |                             |             |                             |
|-------------|-----------------------------|-------------|-----------------------------|-------------|-----------------------------|-------------|-----------------------------|
| $t^* - t_G$ | $\frac{R - R_0}{R_f - R_0}$ | $t^* - t_G$ | $\frac{R - R_0}{R_f - R_0}$ | $t^* - t_G$ | $\frac{R - R_0}{R_f - R_0}$ | $t^* - t_G$ | $\frac{R - R_0}{R_f - R_0}$ |
| -537        | 0                           | -676        | 0                           | -831        | 0                           | -1004       | 0                           |

|      |           |      |           |      |          |      |          |
|------|-----------|------|-----------|------|----------|------|----------|
| -437 | -9.51E-04 | -576 | -9.86E-04 | -731 | -0.00103 | -904 | -0.00109 |
| -337 | 0.00625   | -476 | -9.86E-04 | -631 | -0.00103 | -804 | -0.00109 |
| -237 | 0.03235   | -376 | 0.0048    | -531 | -0.00103 | -704 | -0.00109 |
| -137 | 0.11953   | -276 | 0.02382   | -431 | 0.00312  | -604 | -0.00109 |
| -37  | 0.28871   | -176 | 0.08859   | -331 | 0.01596  | -504 | 0.00133  |
| 63   | 0.51559   | -76  | 0.22319   | -231 | 0.05895  | -404 | 0.0098   |
| 163  | 0.71965   | 24   | 0.4188    | -131 | 0.15729  | -304 | 0.03494  |
| 263  | 0.83498   | 124  | 0.63004   | -31  | 0.312    | -204 | 0.09888  |
| 363  | 0.88828   | 224  | 0.7873    | 69   | 0.5026   | -104 | 0.21008  |
| 463  | 0.91716   | 324  | 0.87195   | 169  | 0.68512  | -4   | 0.36049  |
| 563  | 0.93679   | 424  | 0.91472   | 269  | 0.81571  | 96   | 0.53007  |
| 663  | 0.95198   | 524  | 0.93969   | 369  | 0.89079  | 196  | 0.68853  |
| 763  | 0.96435   | 624  | 0.95683   | 469  | 0.93203  | 296  | 0.80981  |
| 863  | 0.97454   | 724  | 0.96977   | 569  | 0.95656  | 396  | 0.88901  |
| 963  | 0.98288   | 824  | 0.97989   | 669  | 0.97269  | 496  | 0.93713  |
| 1063 | 0.98957   | 924  | 0.98783   | 769  | 0.98403  | 596  | 0.96635  |
| 1163 | 0.99473   | 1024 | 0.99388   | 869  | 0.99214  | 696  | 0.98448  |
| 1263 | 0.99846   | 1124 | 0.99821   | 969  | 0.99773  | 796  | 0.99572  |
| 1363 | 1         | 1224 | 1         | 1069 | 1        | 896  | 1        |
| 1463 | 1         | 1324 | 1         | 1169 | 1        | 996  | 1        |
| 1563 | 1         | 1424 | 1         | 1269 | 1        | 1096 | 1        |
| 1663 | 1         | 1524 | 1         | 1369 | 1        | 1196 | 1        |
| 1763 | 1         | 1624 | 1         | 1469 | 1        | 1296 | 1        |
| 1863 | 1         | 1724 | 1         | 1569 | 1        | 1396 | 1        |

Table S25: Data of Figure 10(c).

| $\square$   | $\nu_{\infty} = 0.00038$ | $\nu_{\infty} = 0.00077$ | $\nu_{\infty} = 0.0025$ | $\nu_{\infty} = 0.012$ |
|-------------|--------------------------|--------------------------|-------------------------|------------------------|
| $T_g - T_0$ | $t_G$                    |                          |                         |                        |
| 4           | 537                      | 510                      | 468                     | 418                    |
| 8           | 676                      | 646                      | 600                     | 545                    |
| 12          | 831                      | 797                      | 746                     | 684                    |
| 16          | 1004                     | 967                      | 908                     | 837                    |

Table S26: Data of Figure 11(a).

| $\square$ | $T_0 = 323$                 | $T_0 = 327$ | $T_0 = 331$ | $T_0 = 335$ |
|-----------|-----------------------------|-------------|-------------|-------------|
| $t^*$     | $\frac{R - R_0}{R_f - R_0}$ |             |             |             |
| 0         | 0                           | 0           | 0           | 0           |

|      |          |          |          |          |
|------|----------|----------|----------|----------|
| 100  | -0.00347 | -0.00347 | -0.00347 | -0.00347 |
| 200  | -0.00347 | -0.00347 | -0.00347 | 0.02078  |
| 300  | -0.00347 | -0.00347 | 0.01578  | 0.10615  |
| 400  | -0.00347 | 0.0101   | 0.07737  | 0.35905  |
| 500  | 0.00417  | 0.05109  | 0.2711   | 0.66704  |
| 600  | 0.03047  | 0.18151  | 0.56679  | 0.83568  |
| 700  | 0.10564  | 0.43199  | 0.7761   | 0.91284  |
| 800  | 0.28103  | 0.67582  | 0.87565  | 0.96054  |
| 900  | 0.51802  | 0.81603  | 0.92978  | 0.99729  |
| 1000 | 0.70822  | 0.88726  | 0.96763  | 1        |
| 1100 | 0.81737  | 0.93039  | 0.99775  | 1        |
| 1200 | 0.87741  | 0.96158  | 1        | 1        |
| 1300 | 0.91486  | 0.98623  | 1        | 1        |
| 1400 | 0.94133  | 1        | 1        | 1        |
| 1500 | 0.96132  | 1        | 1        | 1        |
| 1600 | 0.9767   | 1        | 1        | 1        |
| 1700 | 0.98831  | 1        | 1        | 1        |
| 1800 | 0.99659  | 1        | 1        | 1        |
| 1900 | 1        | 1        | 1        | 1        |
| 2000 | 1        | 1        | 1        | 1        |
| 2100 | 1        | 1        | 1        | 1        |
| 2200 | 1        | 1        | 1        | 1        |
| 2300 | 1        | 1        | 1        | 1        |
| 2400 | 1        | 1        | 1        | 1        |

Table S27: Data of Figure 11(b).

| $T_0 = 323$ |                             | $T_0 = 327$ |                             | $T_0 = 331$ |                             | $T_0 = 335$ |                             |
|-------------|-----------------------------|-------------|-----------------------------|-------------|-----------------------------|-------------|-----------------------------|
| $t^* - t_G$ | $\frac{R - R_0}{R_f - R_0}$ | $t^* - t_G$ | $\frac{R - R_0}{R_f - R_0}$ | $t^* - t_G$ | $\frac{R - R_0}{R_f - R_0}$ | $t^* - t_G$ | $\frac{R - R_0}{R_f - R_0}$ |
| -837        | 0                           | -677        | 0                           | -533        | 0                           | -403        | 0                           |
| -737        | -0.00347                    | -577        | -0.00347                    | -433        | -0.00347                    | -303        | -0.00347                    |
| -637        | -0.00347                    | -477        | -0.00347                    | -333        | -0.00347                    | -203        | 0.02078                     |
| -537        | -0.00347                    | -377        | -0.00347                    | -233        | 0.01578                     | -103        | 0.10615                     |
| -437        | -0.00347                    | -277        | 0.0101                      | -133        | 0.07737                     | -3          | 0.35905                     |
| -337        | 0.00417                     | -177        | 0.05109                     | -33         | 0.2711                      | 97          | 0.66704                     |
| -237        | 0.03047                     | -77         | 0.18151                     | 67          | 0.56679                     | 197         | 0.83568                     |
| -137        | 0.10564                     | 23          | 0.43199                     | 167         | 0.7761                      | 297         | 0.91284                     |
| -37         | 0.28103                     | 123         | 0.67582                     | 267         | 0.87565                     | 397         | 0.96054                     |
| 63          | 0.51802                     | 223         | 0.81603                     | 367         | 0.92978                     | 497         | 0.99729                     |
| 163         | 0.70822                     | 323         | 0.88726                     | 467         | 0.96763                     | 597         | 1                           |
| 263         | 0.81737                     | 423         | 0.93039                     | 567         | 0.99775                     | 697         | 1                           |

|      |         |      |         |      |   |      |   |
|------|---------|------|---------|------|---|------|---|
| 363  | 0.87741 | 523  | 0.96158 | 667  | 1 | 797  | 1 |
| 463  | 0.91486 | 623  | 0.98623 | 767  | 1 | 897  | 1 |
| 563  | 0.94133 | 723  | 1       | 867  | 1 | 997  | 1 |
| 663  | 0.96132 | 823  | 1       | 967  | 1 | 1097 | 1 |
| 763  | 0.9767  | 923  | 1       | 1067 | 1 | 1197 | 1 |
| 863  | 0.98831 | 1023 | 1       | 1167 | 1 | 1297 | 1 |
| 963  | 0.99659 | 1123 | 1       | 1267 | 1 | 1397 | 1 |
| 1063 | 1       | 1223 | 1       | 1367 | 1 | 1497 | 1 |
| 1163 | 1       | 1323 | 1       | 1467 | 1 | 1597 | 1 |
| 1263 | 1       | 1423 | 1       | 1567 | 1 | 1697 | 1 |
| 1363 | 1       | 1523 | 1       | 1667 | 1 | 1797 | 1 |
| 1463 | 1       | 1623 | 1       | 1767 | 1 | 1897 | 1 |
| 1563 | 1       | 1723 | 1       | 1867 | 1 | 1997 | 1 |

Table S28: Data of Figure 11(c).

| $\square$   | $\nu_{\infty} = 0.00038$ | $\nu_{\infty} = 0.00077$ | $\nu_{\infty} = 0.0025$ | $\nu_{\infty} = 0.012$ |
|-------------|--------------------------|--------------------------|-------------------------|------------------------|
| $T_g - T_0$ | $t_G$                    |                          |                         |                        |
| 4           | 521                      | 495                      | 454                     | 403                    |
| 8           | 663                      | 635                      | 589                     | 533                    |
| 12          | 821                      | 790                      | 739                     | 677                    |
| 16          | 1004                     | 967                      | 908                     | 837                    |

Table S29: Data of Figure 12(a).

|       | $\Delta H = 1500$           | $\Delta H = 10000$ | $\Delta H = 15000$ | $\Delta H = 100000$ |
|-------|-----------------------------|--------------------|--------------------|---------------------|
| $t^*$ | $\frac{R - R_0}{R_f - R_0}$ |                    |                    |                     |
| 0     | 0                           | 0                  | 0                  | 0                   |
| 200   | -0.00621                    | -0.00387           | -0.00333           | -0.00168            |
| 400   | -0.00621                    | -0.00387           | -0.00333           | -0.00168            |
| 600   | 0.01969                     | 0.02764            | 0.03165            | 0.08308             |
| 800   | 0.34001                     | 0.28466            | 0.28074            | 0.35643             |
| 1000  | 0.80925                     | 0.71544            | 0.70688            | 0.74298             |
| 1200  | 0.94579                     | 0.88218            | 0.87646            | 0.89106             |
| 1400  | 0.97798                     | 0.94371            | 0.94087            | 0.94813             |
| 1600  | 0.99163                     | 0.97761            | 0.97654            | 0.97955             |
| 1800  | 0.99879                     | 0.99672            | 0.99657            | 0.99703             |
| 2000  | 1                           | 1                  | 1                  | 1                   |
| 2200  | 1                           | 1                  | 1                  | 1                   |
| 2400  | 1                           | 1                  | 1                  | 1                   |

Table S30: Data of Figure 12(b).

| $\square$ | $\chi_0 = 0.35$             | $\chi_0 = 0.4$ | $\chi_0 = 0.45$ | $\chi_0 = 0.5$ |
|-----------|-----------------------------|----------------|-----------------|----------------|
| $t^*$     | $\frac{R - R_0}{R_f - R_0}$ |                |                 |                |
| 0         | 0                           | 0              | 0               | 0              |
| 200       | -0.00312                    | -0.00326       | -0.00343        | -0.00362       |
| 400       | -0.00312                    | -0.00326       | -0.00343        | -0.00362       |
| 600       | 0.02479                     | 0.02633        | 0.02819         | 0.03046        |
| 800       | 0.26817                     | 0.27249        | 0.27684         | 0.28107        |
| 1000      | 0.72171                     | 0.71981        | 0.71542         | 0.7075         |
| 1200      | 0.90246                     | 0.89615        | 0.88779         | 0.87662        |
| 1400      | 0.95709                     | 0.95292        | 0.94765         | 0.94087        |
| 1600      | 0.98338                     | 0.9816         | 0.97936         | 0.97651        |
| 1800      | 0.99759                     | 0.99732        | 0.99699         | 0.99657        |
| 2000      | 1                           | 1              | 1               | 1              |
| 2200      | 1                           | 1              | 1               | 1              |
| 2400      | 1                           | 1              | 1               | 1              |

Table S31: Data of Figure 12(c).

| $\square$ | Fig12(c)                    |           |          |          |
|-----------|-----------------------------|-----------|----------|----------|
| $\square$ | $c = 0.09$                  | $c = 0.9$ | $c = 9$  | $c = 90$ |
| $t^*$     | $\frac{R - R_0}{R_f - R_0}$ |           |          |          |
| 0         | 0                           | 0         | 0        | 0        |
| 200       | -0.00347                    | -0.00347  | -0.00347 | -0.00347 |
| 400       | -0.00347                    | -0.00347  | -0.00347 | -0.00347 |
| 600       | 0.03047                     | 0.03047   | 0.03047  | 0.03047  |
| 800       | 0.28103                     | 0.28103   | 0.28103  | 0.28103  |
| 1000      | 0.70822                     | 0.70822   | 0.70822  | 0.70822  |
| 1200      | 0.87741                     | 0.87741   | 0.87741  | 0.87741  |
| 1400      | 0.94133                     | 0.94133   | 0.94133  | 0.94133  |
| 1600      | 0.9767                      | 0.9767    | 0.9767   | 0.9767   |
| 1800      | 0.99659                     | 0.99659   | 0.99659  | 0.99659  |
| 2000      | 1                           | 1         | 1        | 1        |

|      |   |   |   |   |
|------|---|---|---|---|
| 2200 | 1 | 1 | 1 | 1 |
| 2400 | 1 | 1 | 1 | 1 |

Table S32: Data of Figure 13.

| $t_G$ from simulation | $t_G$ from Eqn.(39) |
|-----------------------|---------------------|-----------------------|---------------------|-----------------------|---------------------|-----------------------|---------------------|
| 968                   | 932.6264            | 932                   | 934.865             | 797                   | 802.7382            | 663                   | 686.6687            |
| 989                   | 965.4174            | 810                   | 809.9985            | 967                   | 953.9173            | 821                   | 837.8478            |
| 1010                  | 998.2084            | 826                   | 830.5267            | 468                   | 448.8207            | 495                   | 500.3799            |
| 1031                  | 1030.999            | 842                   | 851.0549            | 600                   | 599.9998            | 635                   | 651.559             |
| 932                   | 902.6694            | 857                   | 871.5831            | 746                   | 751.1789            | 790                   | 802.7382            |
| 953                   | 932.4647            | 537                   | 535.4896            | 908                   | 902.3581            | 454                   | 448.8207            |
| 973                   | 962.26              | 676                   | 686.6687            | 418                   | 391.7696            | 589                   | 599.9998            |
| 993                   | 992.0553            | 831                   | 837.8478            | 545                   | 542.9487            | 739                   | 751.1789            |
| 877                   | 858.6769            | 1004                  | 989.0269            | 684                   | 694.1279            | 403                   | 391.7696            |
| 895                   | 884.0729            | 510                   | 500.3799            | 837                   | 845.307             | 533                   | 542.9487            |
| 914                   | 909.4689            | 646                   | 651.559             | 521                   | 535.4896            | 677                   | 694.1279            |

Table S33: Data of Figure 14(a-b).

| □     | Fig14(a)                    |          |           |         | Fig14(b)   |          |         |           |
|-------|-----------------------------|----------|-----------|---------|------------|----------|---------|-----------|
|       | ratio=3.21                  |          |           |         | ratio=1.69 |          |         |           |
| □     | parabolic                   | b=1/20   | b=1/7     | b=1     | b=1/20     | b=1/7    | b=1     | parabolic |
| $t^*$ | $\frac{R - R_0}{R_f - R_0}$ |          |           |         |            |          |         |           |
| 0     | 0                           | 0        | 0         | 0       | 0          | 0        | 0       | 0         |
| 100   | -0.00109                    | -0.00637 | -0.00109  | 0.02634 | -0.0078    | -0.00347 | 0.08027 | -0.00347  |
| 200   | -0.00109                    | -0.00637 | -0.00109  | 1       | -0.0078    | -0.00347 | 1       | -0.00347  |
| 300   | -0.00109                    | -0.00637 | -0.00109  | 1       | -0.0078    | -0.00347 | 1       | -0.00347  |
| 400   | -0.00109                    | -0.00637 | -0.00109  | 1       | -0.0078    | -0.00347 | 1       | -0.00347  |
| 500   | 0.00133                     | -0.00637 | -8.96E-04 | 1       | -0.0078    | -0.00286 | 1       | 0.00417   |
| 600   | 0.0098                      | -0.00637 | 0.00607   | 1       | -0.0078    | 0.01897  | 1       | 0.03047   |
| 700   | 0.03494                     | -0.00637 | 0.02881   | 1       | -0.0078    | 0.08759  | 1       | 0.10564   |
| 800   | 0.09888                     | -0.00637 | 0.11034   | 1       | -0.0078    | 0.30969  | 1       | 0.28103   |
| 900   | 0.21008                     | -0.00637 | 0.29153   | 1       | -0.0078    | 0.6364   | 1       | 0.51802   |
| 1000  | 0.36049                     | -0.00637 | 0.5695    | 1       | -0.0078    | 0.8346   | 1       | 0.70822   |
| 1100  | 0.53007                     | -0.00637 | 0.83687   | 1       | -0.0078    | 0.92342  | 1       | 0.81737   |
| 1200  | 0.68853                     | -0.00637 | 0.97269   | 1       | -0.0078    | 0.98055  | 1       | 0.87741   |
| 1300  | 0.80981                     | -0.00637 | 1         | 1       | -0.0078    | 1        | 1       | 0.91486   |



|      |         |          |   |   |         |   |   |         |
|------|---------|----------|---|---|---------|---|---|---------|
| 1400 | 0.88901 | -0.00637 | 1 | 1 | -0.0078 | 1 | 1 | 0.94133 |
| 1500 | 0.93713 | 0.00292  | 1 | 1 | 0.0035  | 1 | 1 | 0.96132 |
| 1600 | 0.96635 | 0.01583  | 1 | 1 | 0.01911 | 1 | 1 | 0.9767  |
| 1700 | 0.98448 | 0.03291  | 1 | 1 | 0.03954 | 1 | 1 | 0.98831 |
| 1800 | 0.99572 | 0.05853  | 1 | 1 | 0.06982 | 1 | 1 | 0.99659 |
| 1900 | 1       | 0.10039  | 1 | 1 | 0.11862 | 1 | 1 | 1       |
| 2000 | 1       | 0.17028  | 1 | 1 | 0.19875 | 1 | 1 | 1       |
| 2100 | 1       | 0.28289  | 1 | 1 | 0.32444 | 1 | 1 | 1       |
| 2200 | 1       | 0.45229  | 1 | 1 | 0.50475 | 1 | 1 | 1       |
| 2300 | 1       | 0.68903  | 1 | 1 | 0.73636 | 1 | 1 | 1       |
| 2400 | 1       | 1        | 1 | 1 | 1       | 1 | 1 | 1       |
